# Supplementary material
Source: PubMed Central journal article supplement (PMC5891356)

Fig 1

**Schema of 7 Antioxidant Drugs' Cellular Sites of Action:**

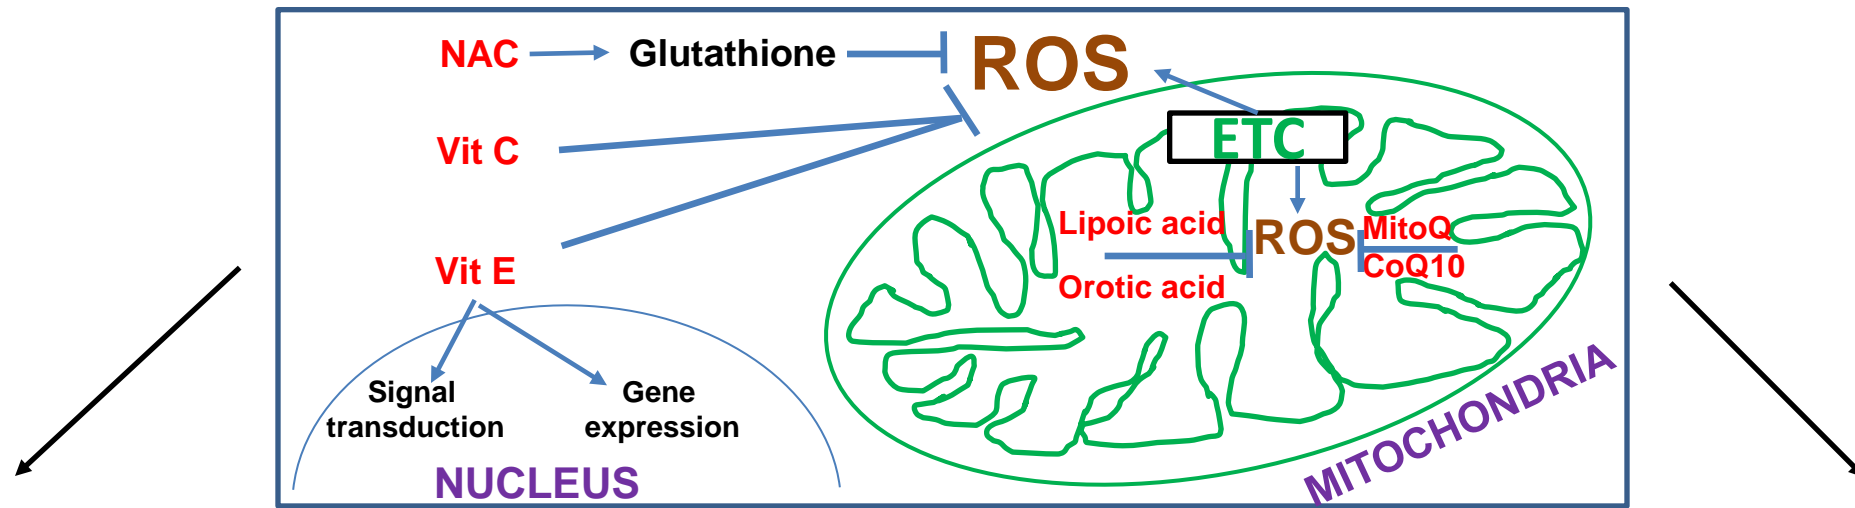

**Primary Animal Model for Drug Effect Studies:**

*C. elegans* (nematode)  
Complex I *gas-1(fc21)* model

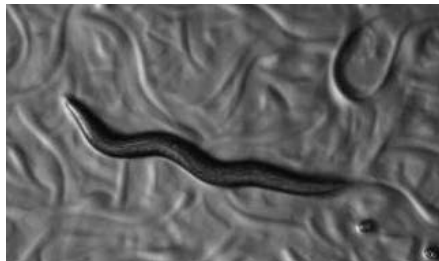

**Drugs Studied:** NAC, Vit C, Vit E, MitoQ, CoQ10, Lipoate, Orotate

**1° Outcome:**

- Worm Lifespan

**2° Outcomes:**

- Mitochondrial physiology (Microscopy)
- Metabolome profiling (HPLC, GC/MS)
- Transcriptome profiling (Microarray+RNAseq)

**Validation Models for Drug Effect Studies:**

Human Fibroblasts  
Complex I genetic disease

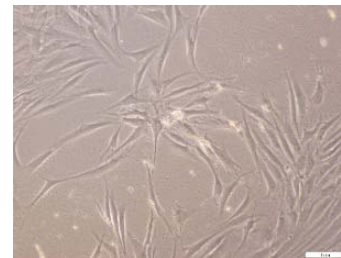

**Drug Studied:** NAC

**Outcomes:**

- Cell viability (CellGlo)
- Mitochondrial physiology (FACS)

*D. rerio* (zebrafish)  
Complex I inhibition (rotenone)

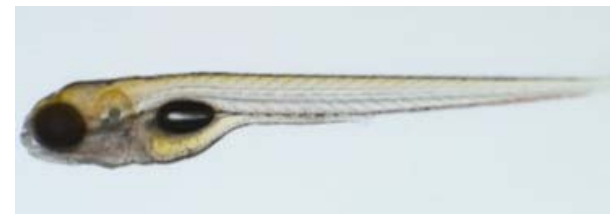

**Drugs Studied:** NAC, Vit E

**Outcome:**

- Brain death (Microscopy)

**Fig 2.****N-acetylcysteine**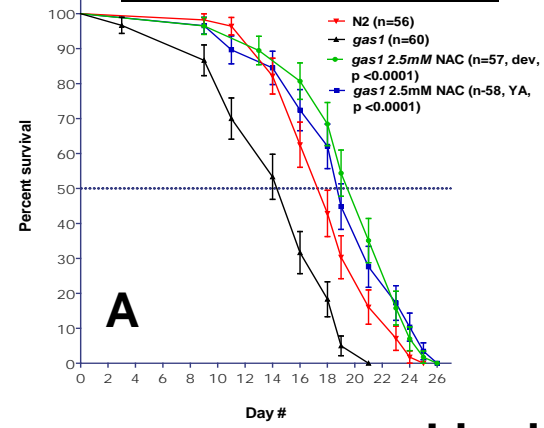**Vitamin E**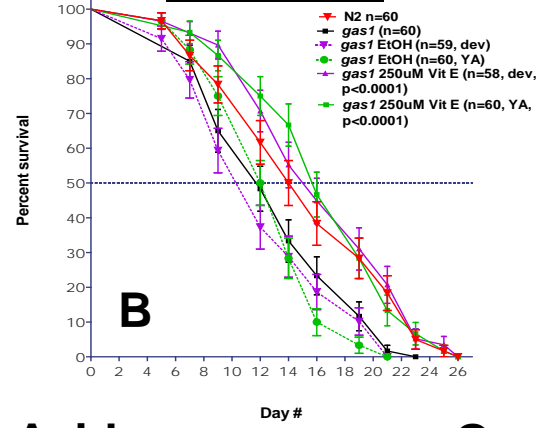**CoQ10**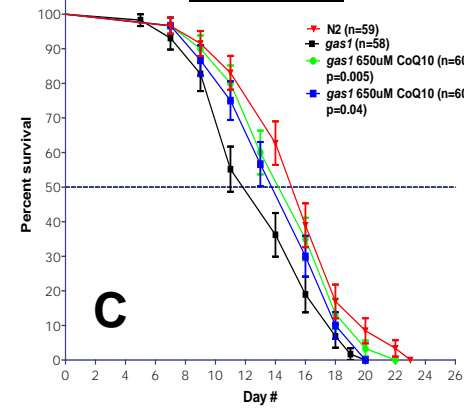**Lipoic Acid**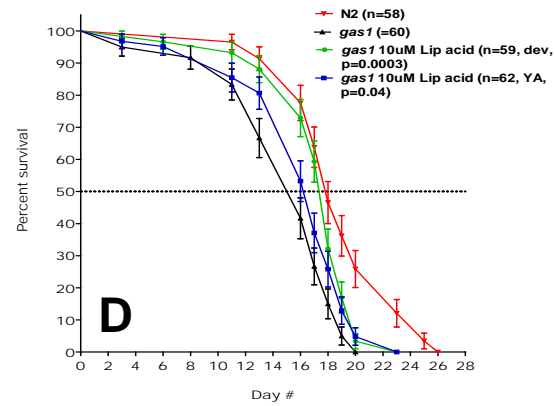**Orotic Acid**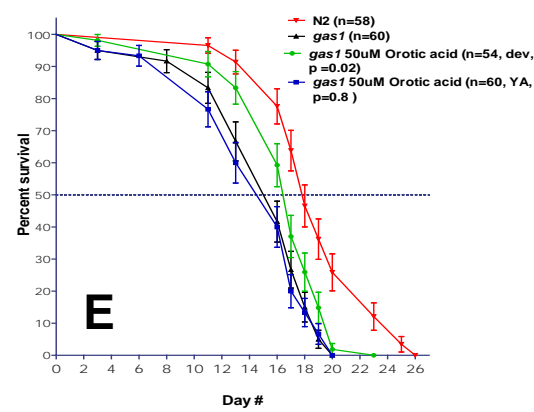**Vitamin C**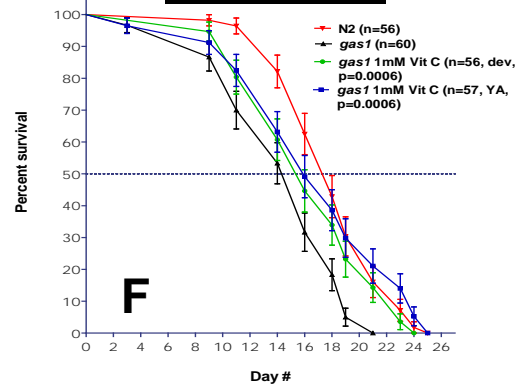**MS010**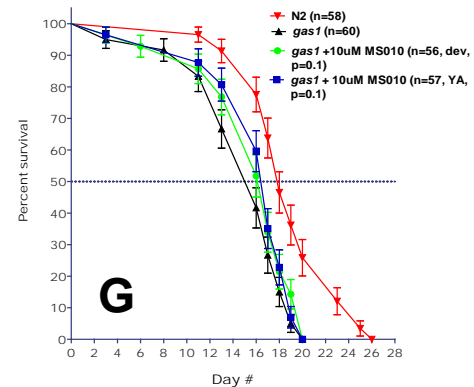**dTPP**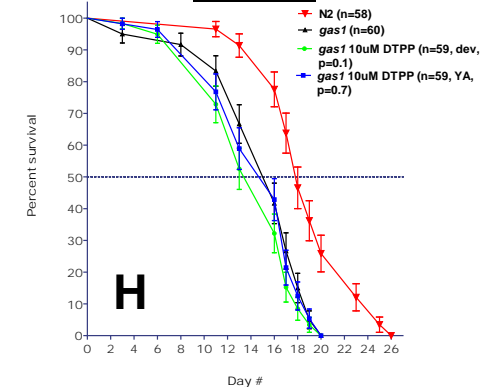

Fig 3.

### Mitochondrial Physiology Effects in *gas-1(fc21)* *C. elegans*

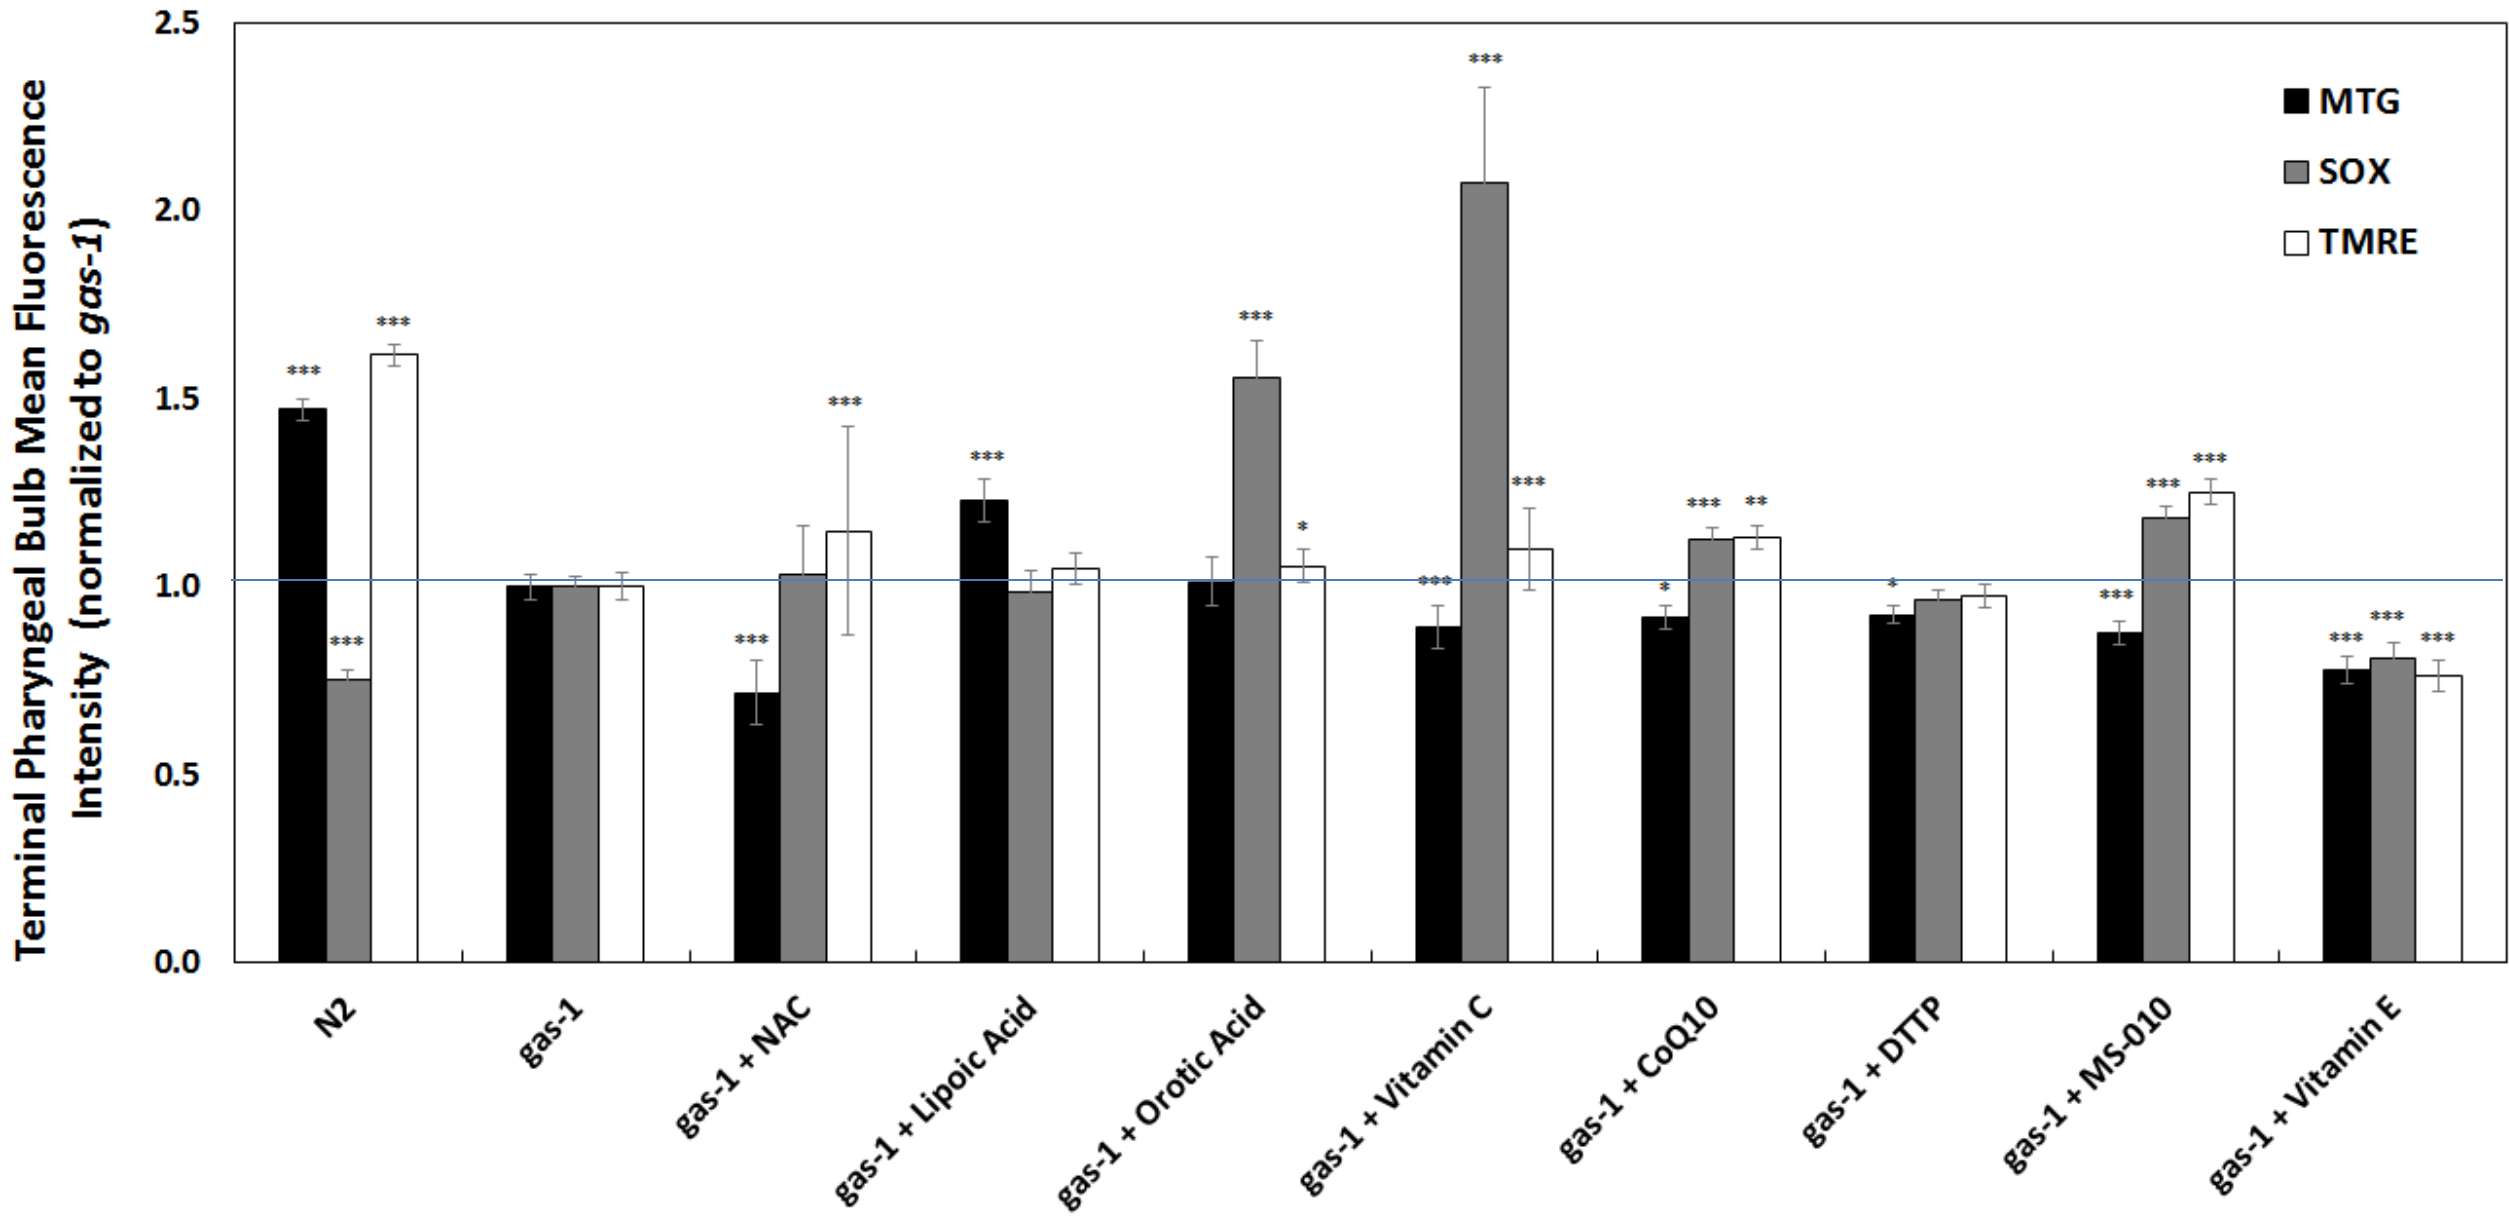

Fig 4.

**Antioxidant Pathway Expression**

**A**

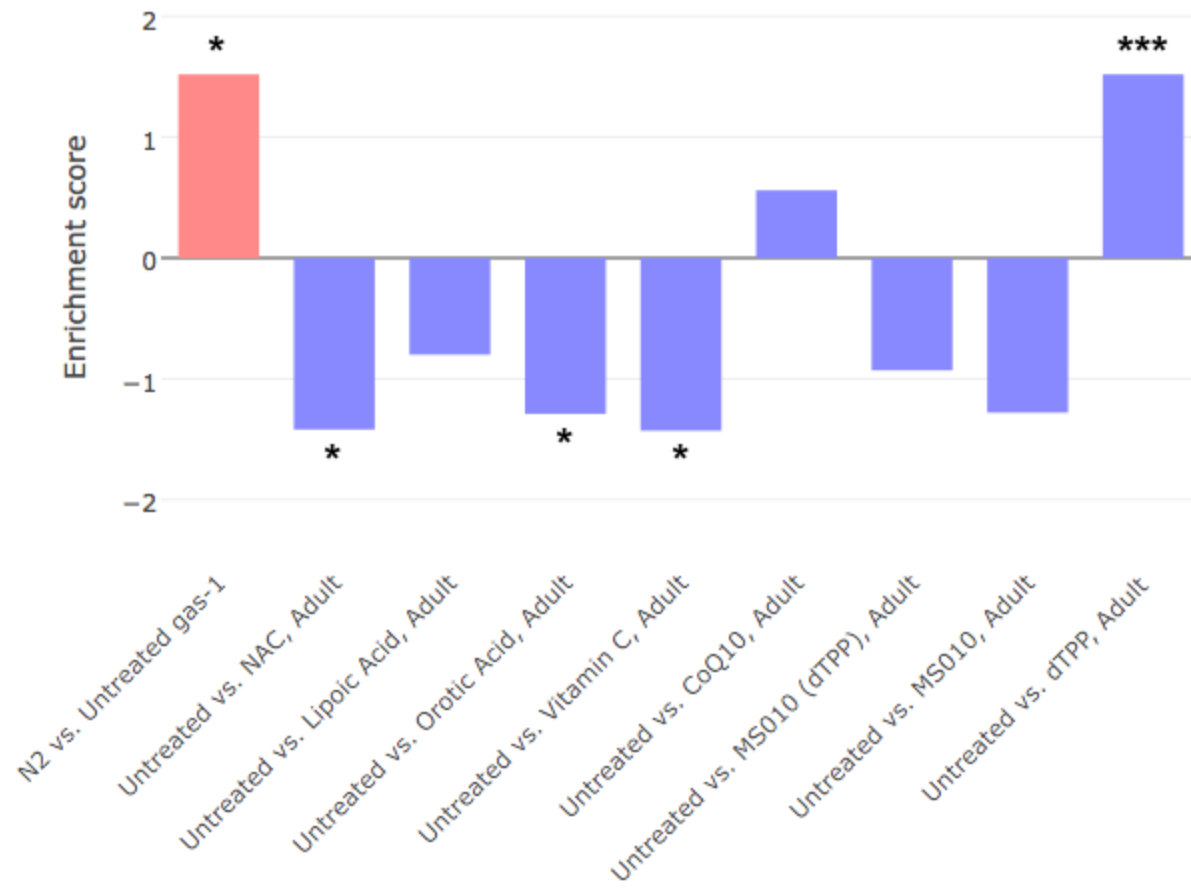

**B**

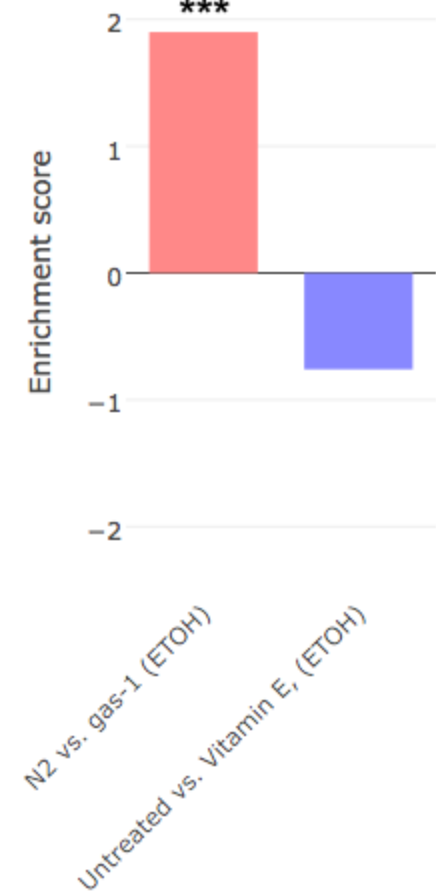

**Fig 5.**

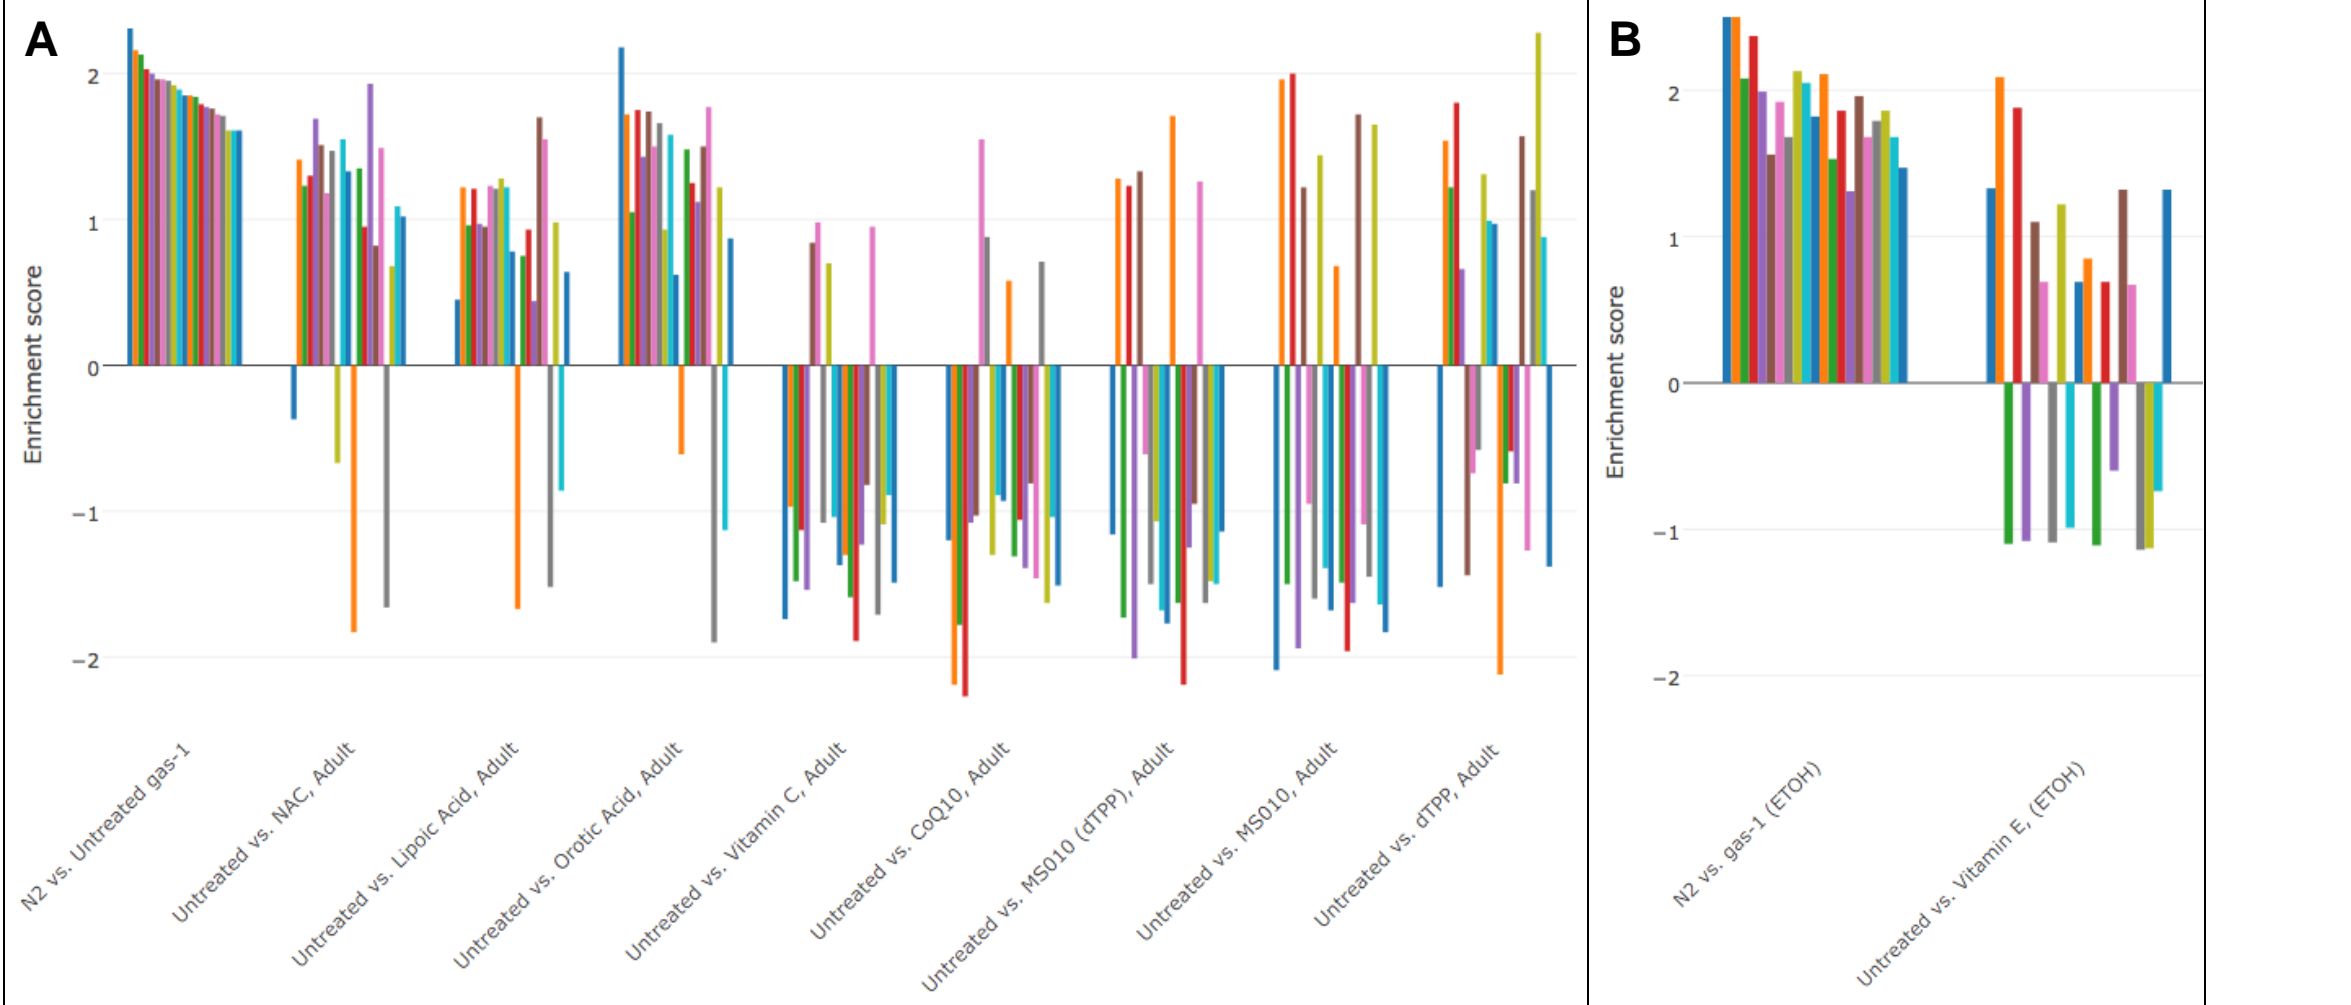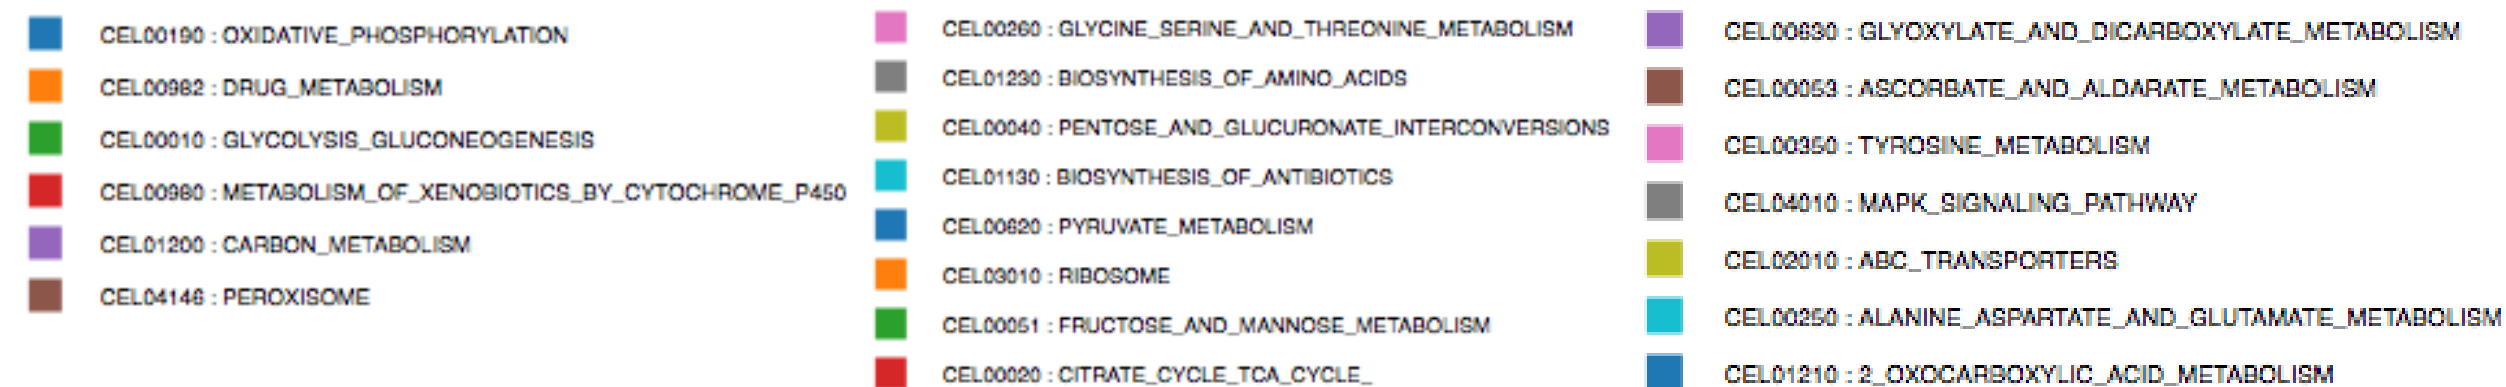

**Fig 6.**

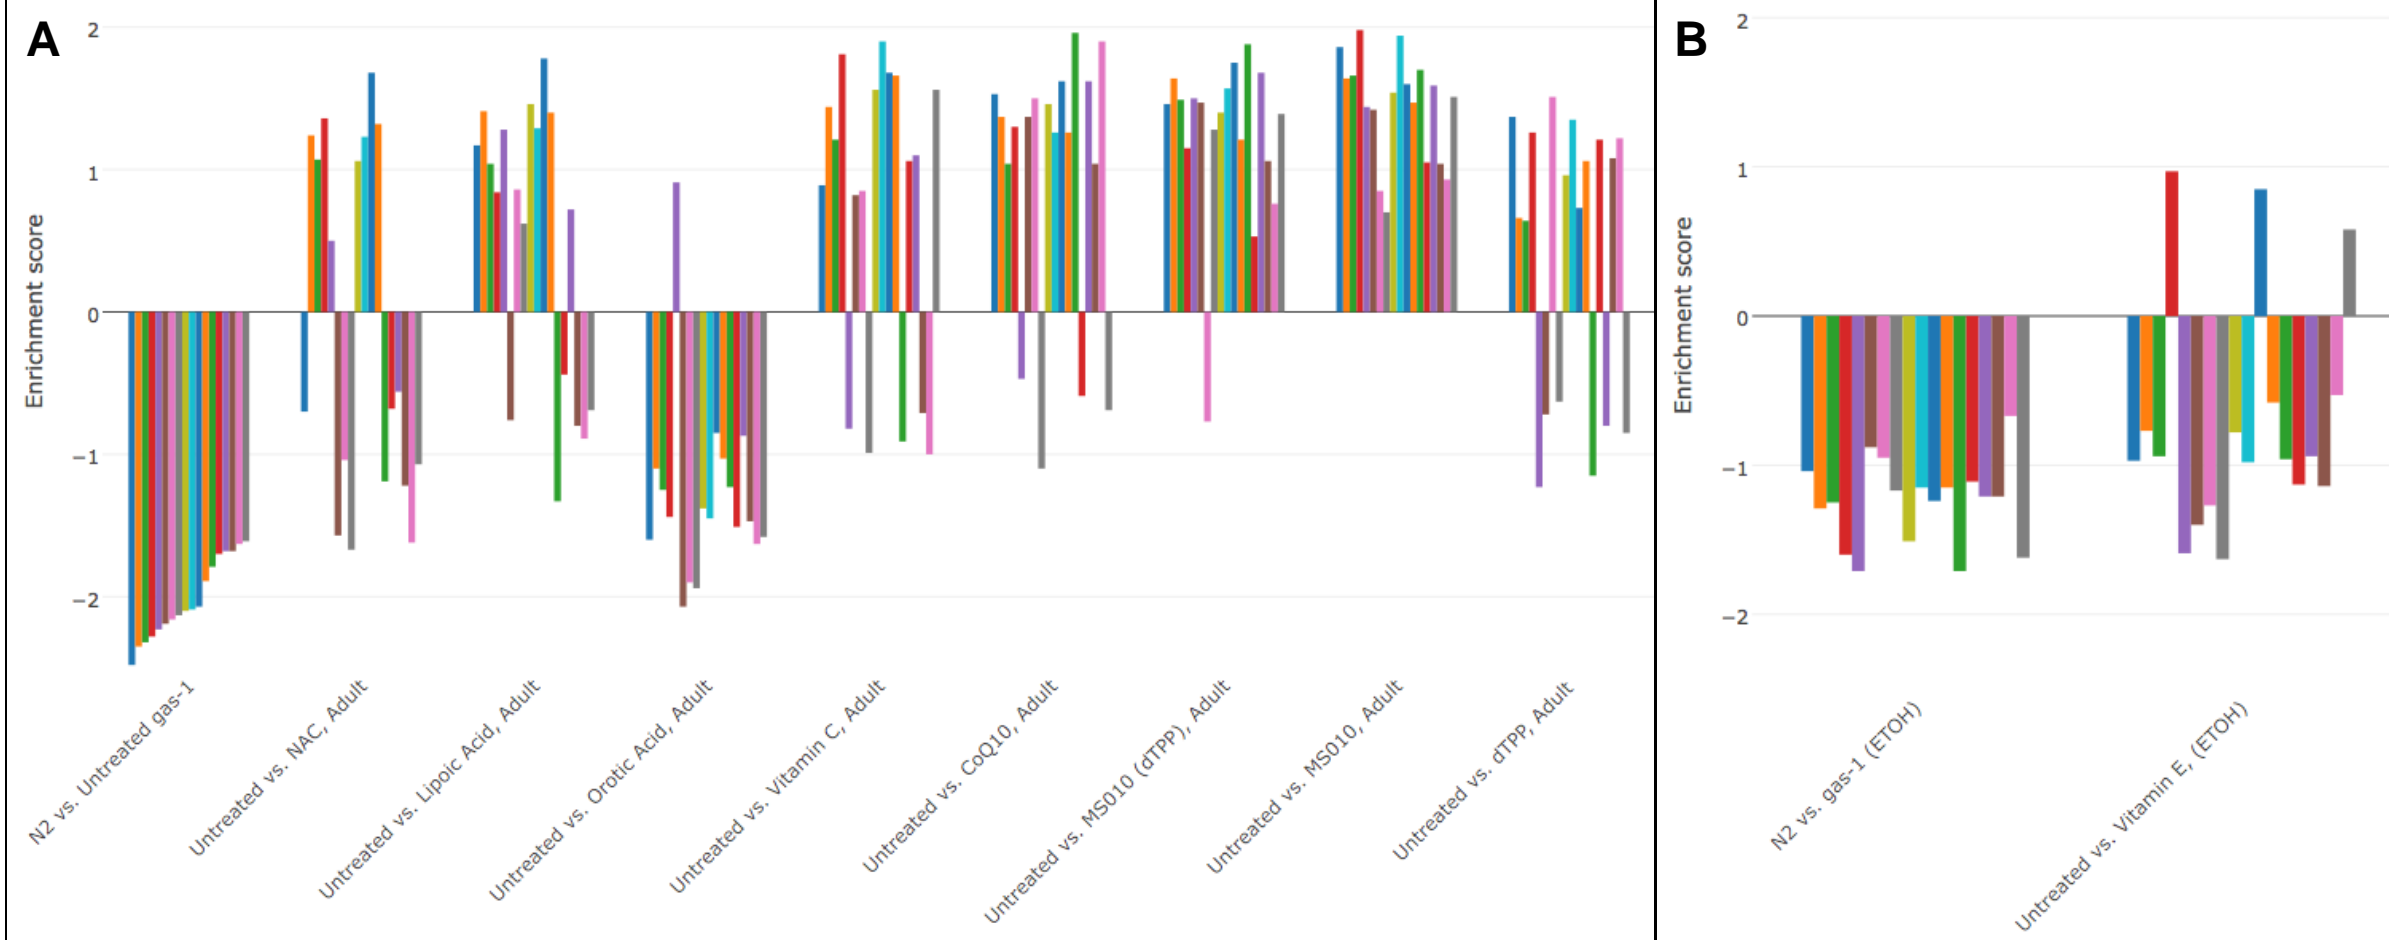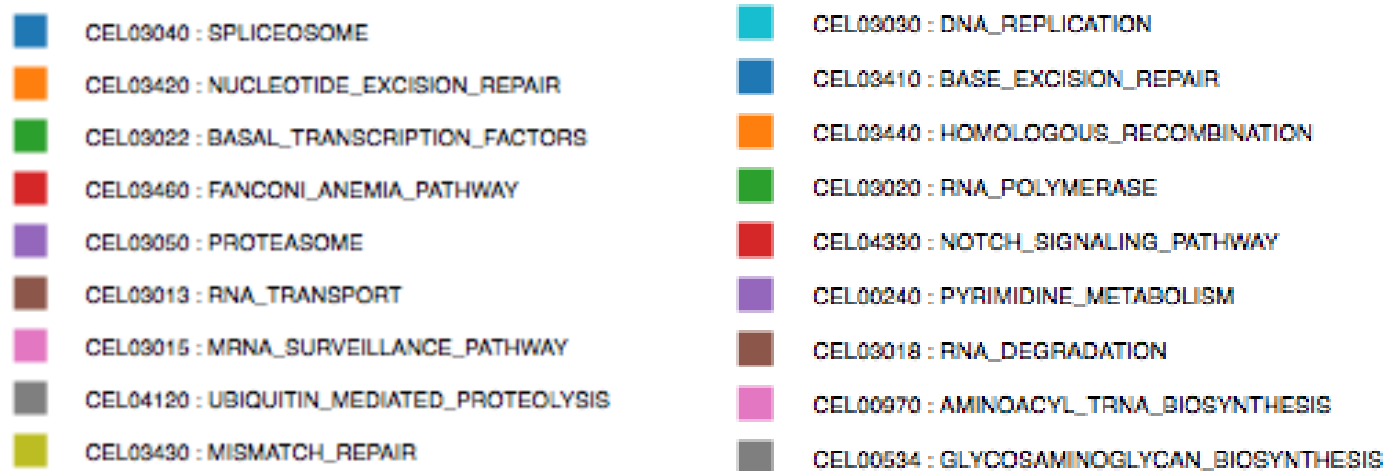

Fig 7.

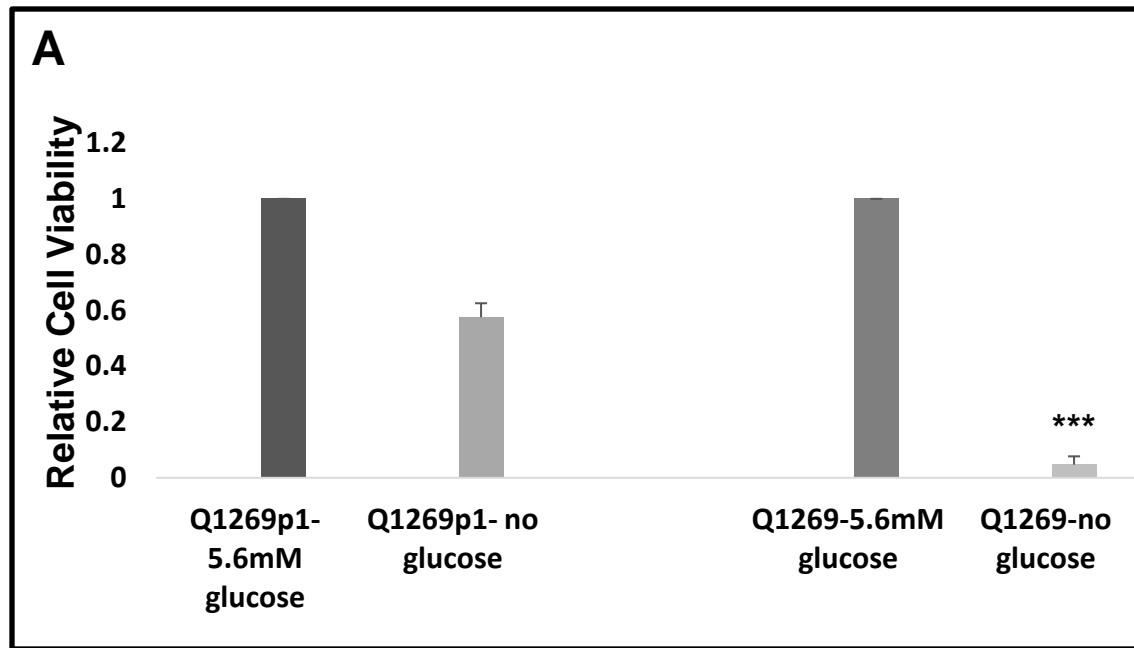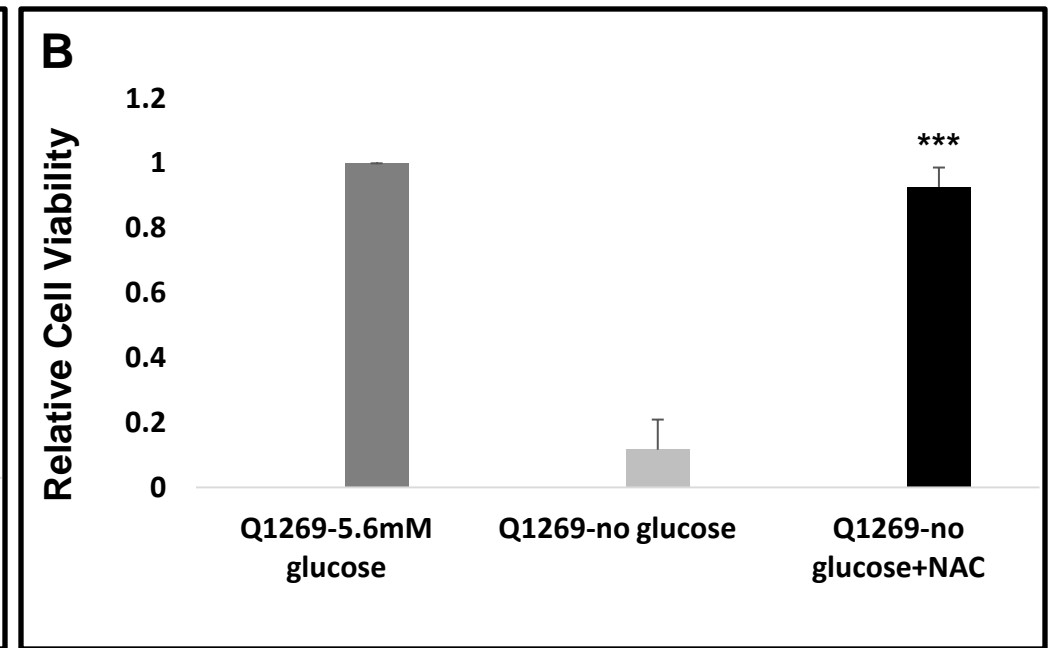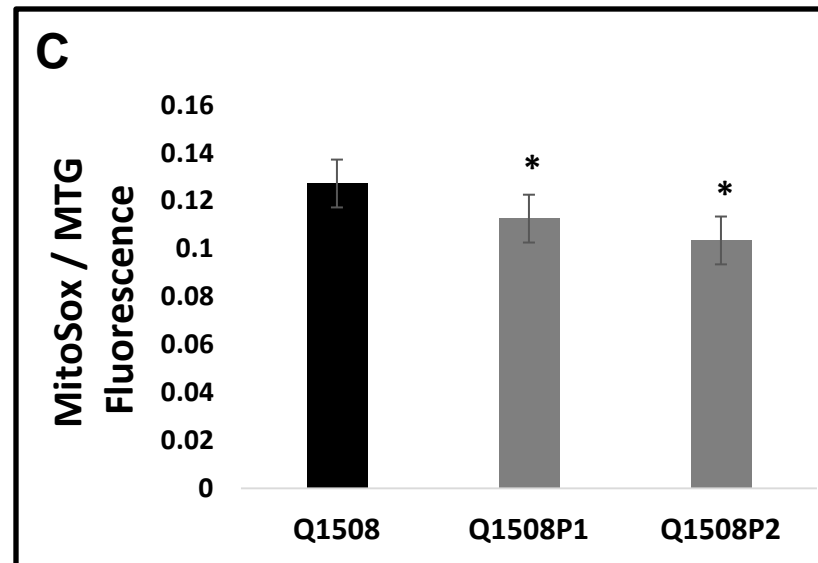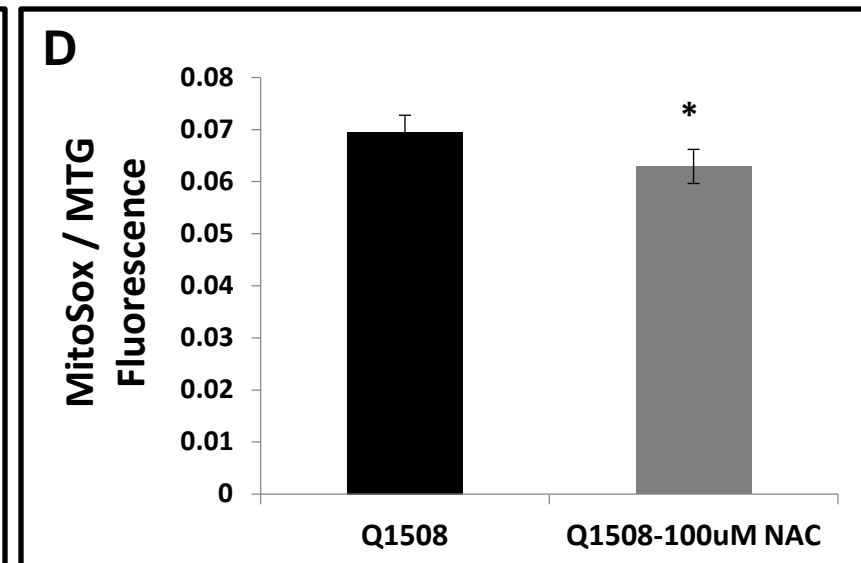

Fig 8.

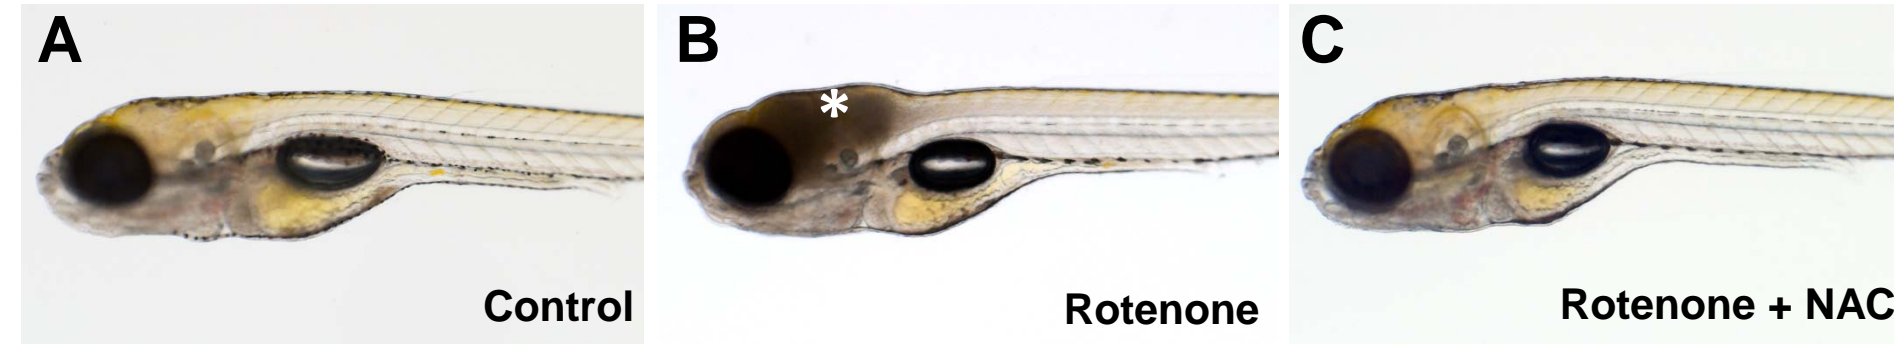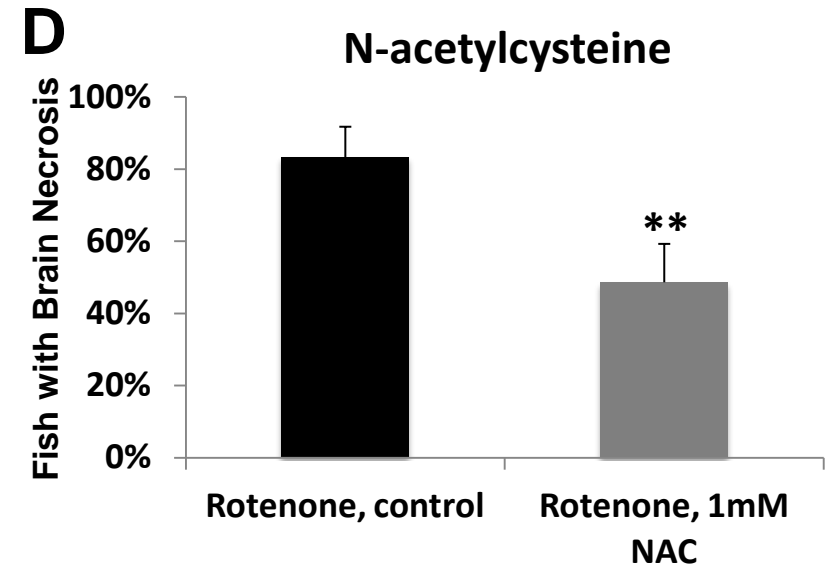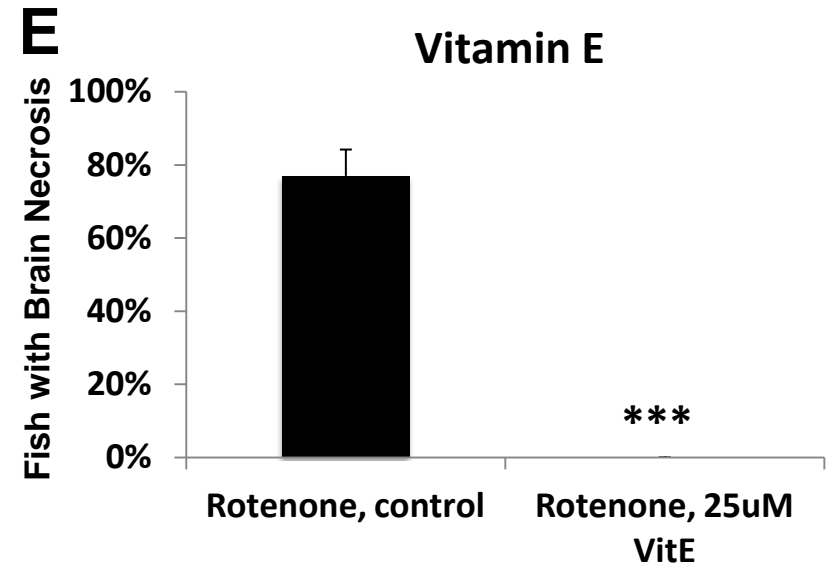



# **SUPPLEMENTAL FILES**

**Polyak et al.**

**Fig S1.**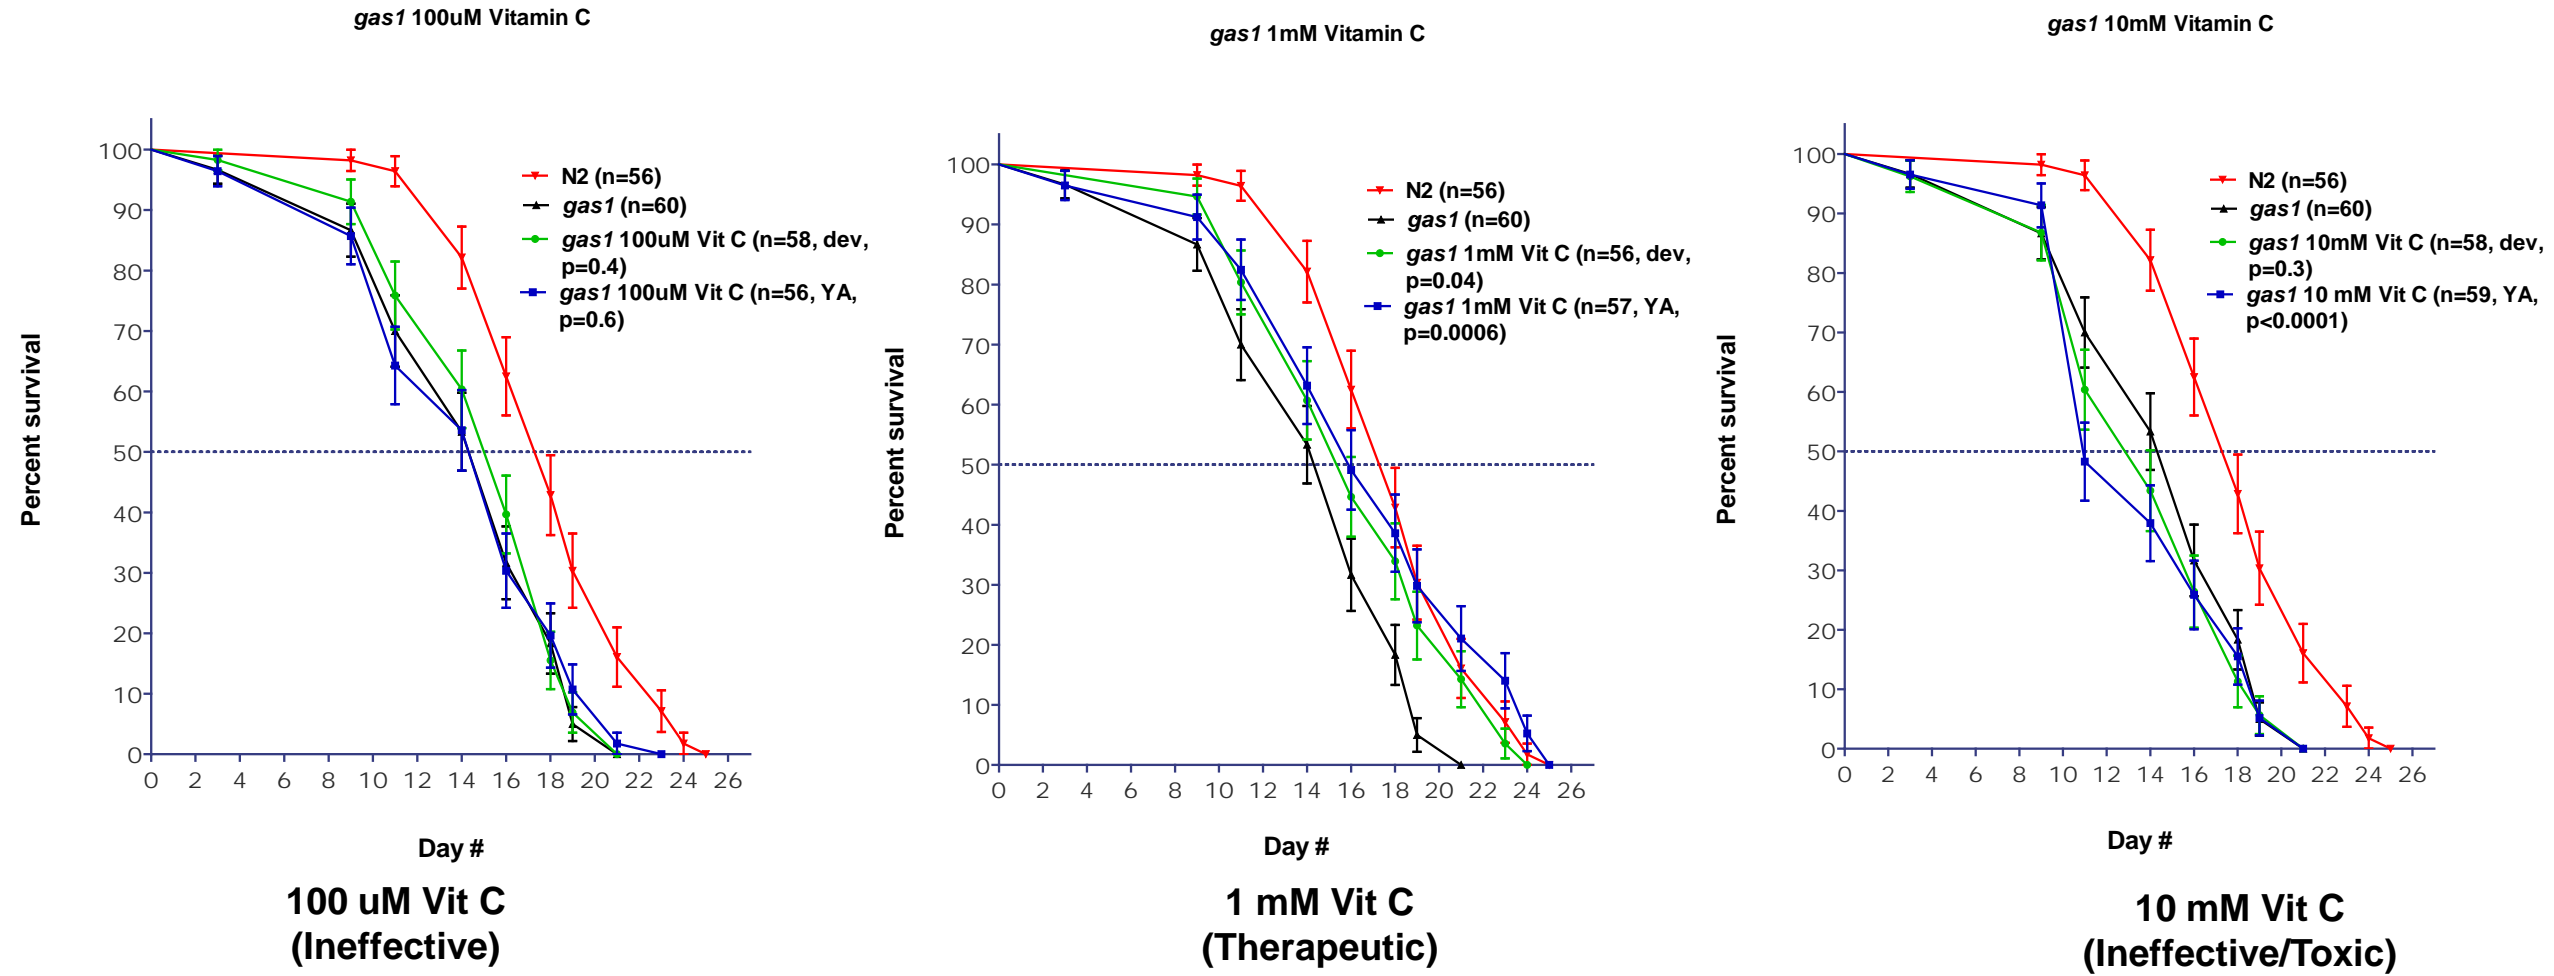

Fig S2

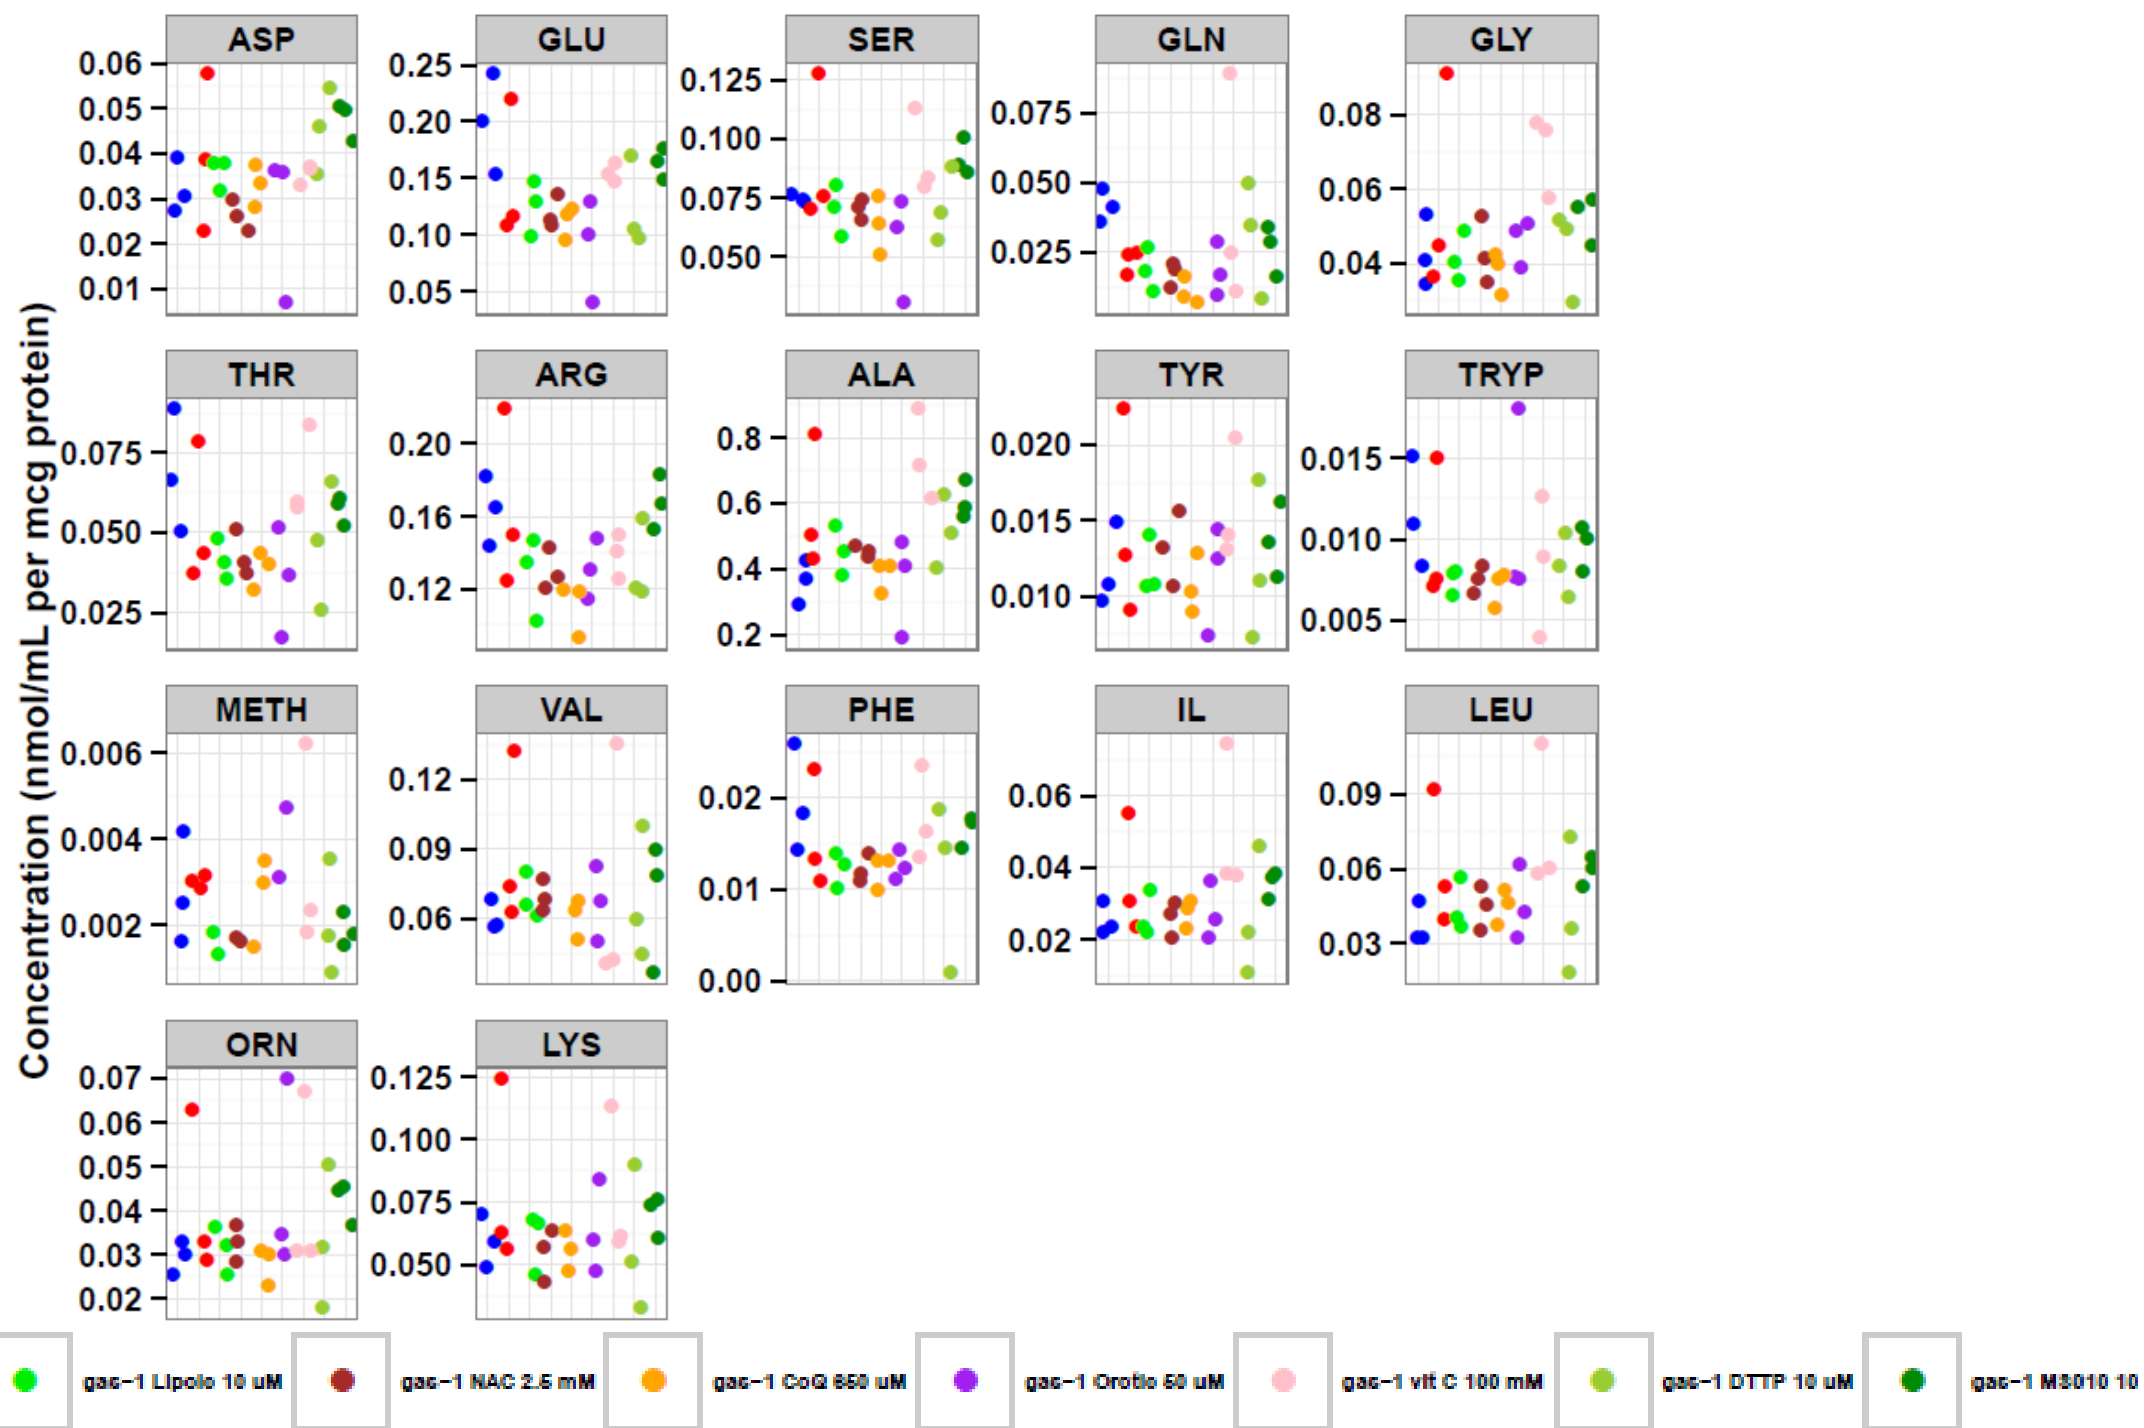

Fig S3

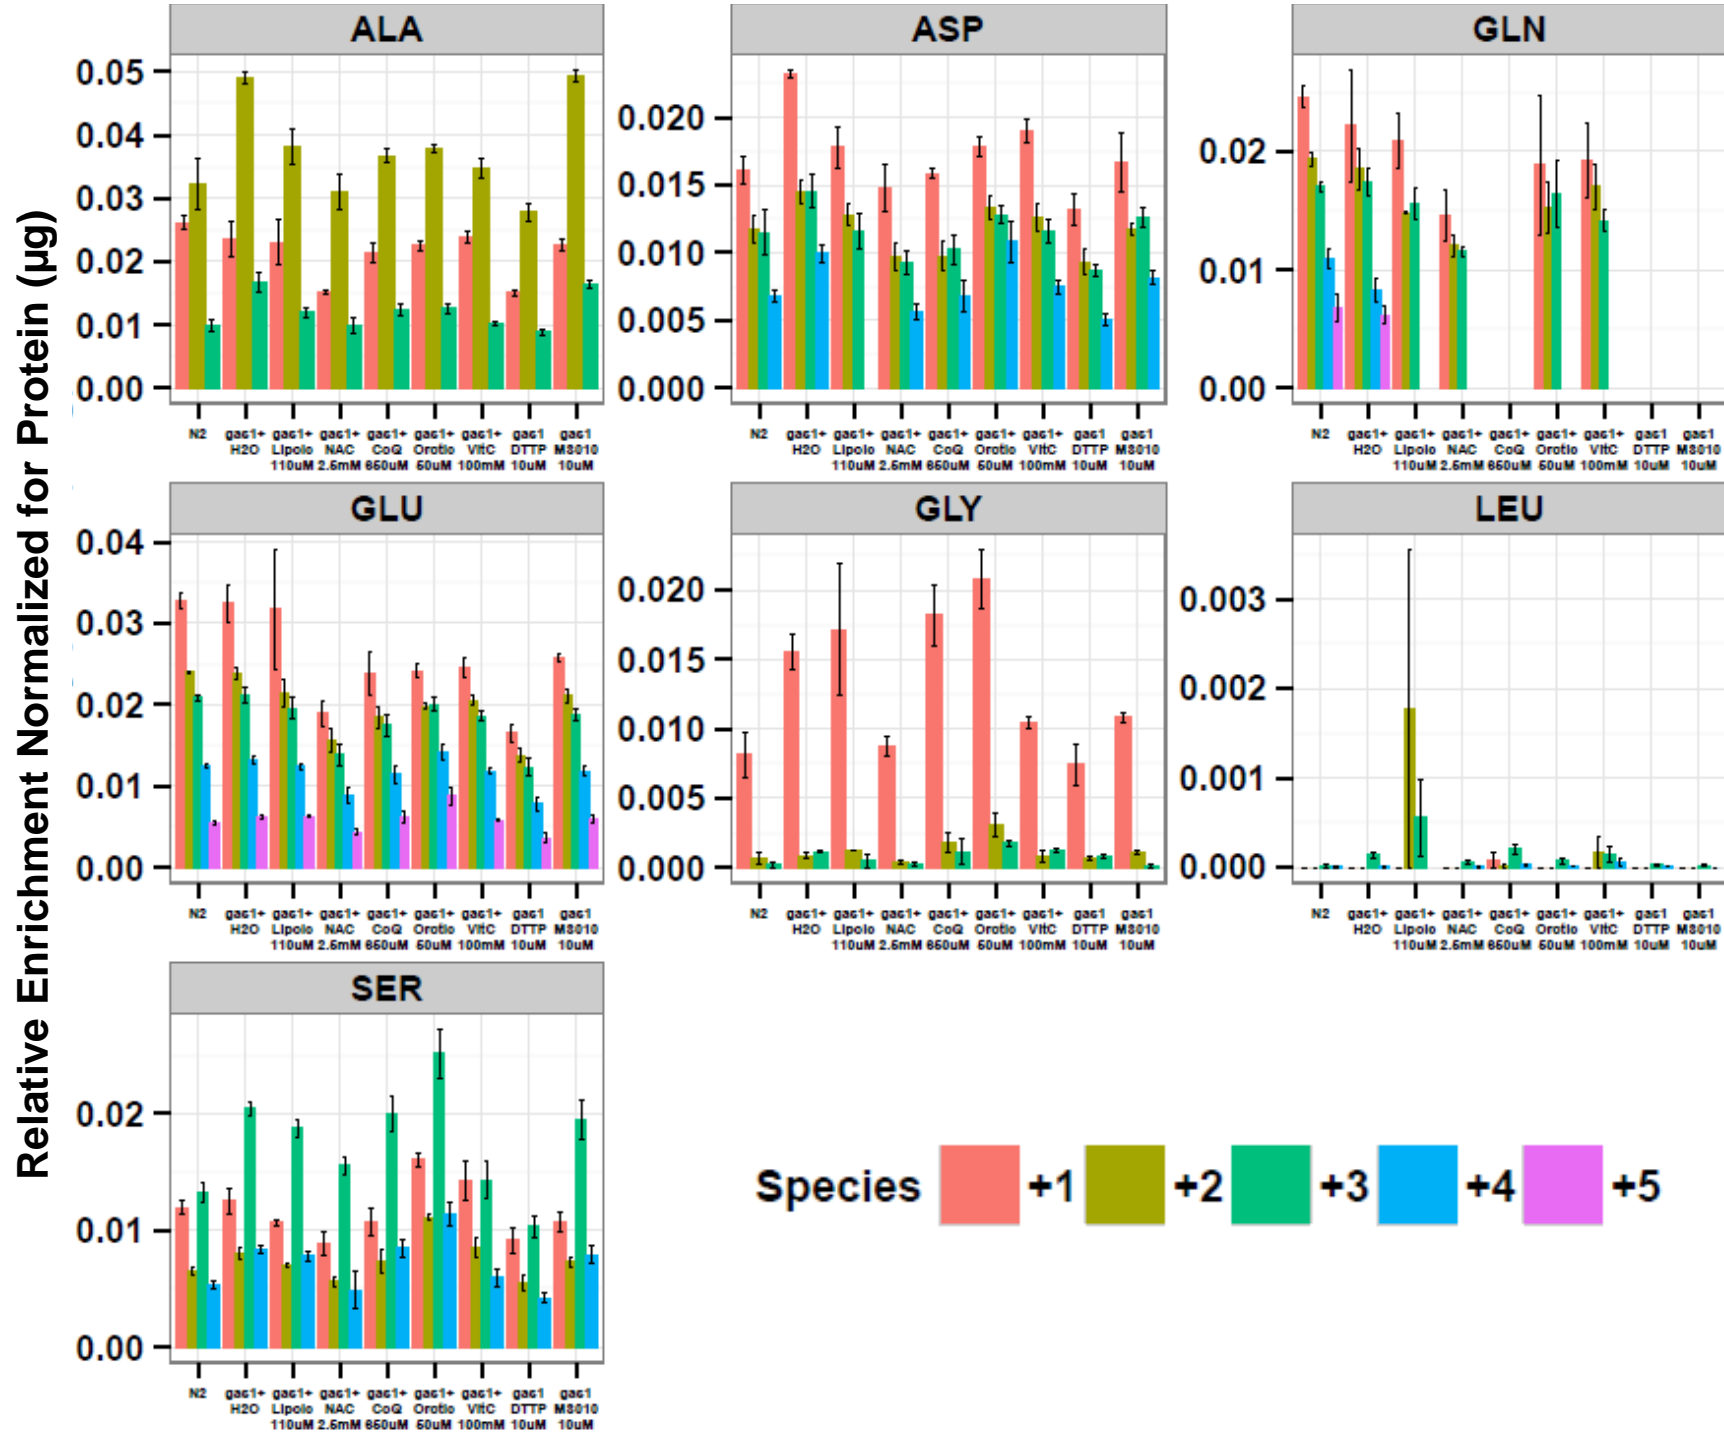

Fig S4

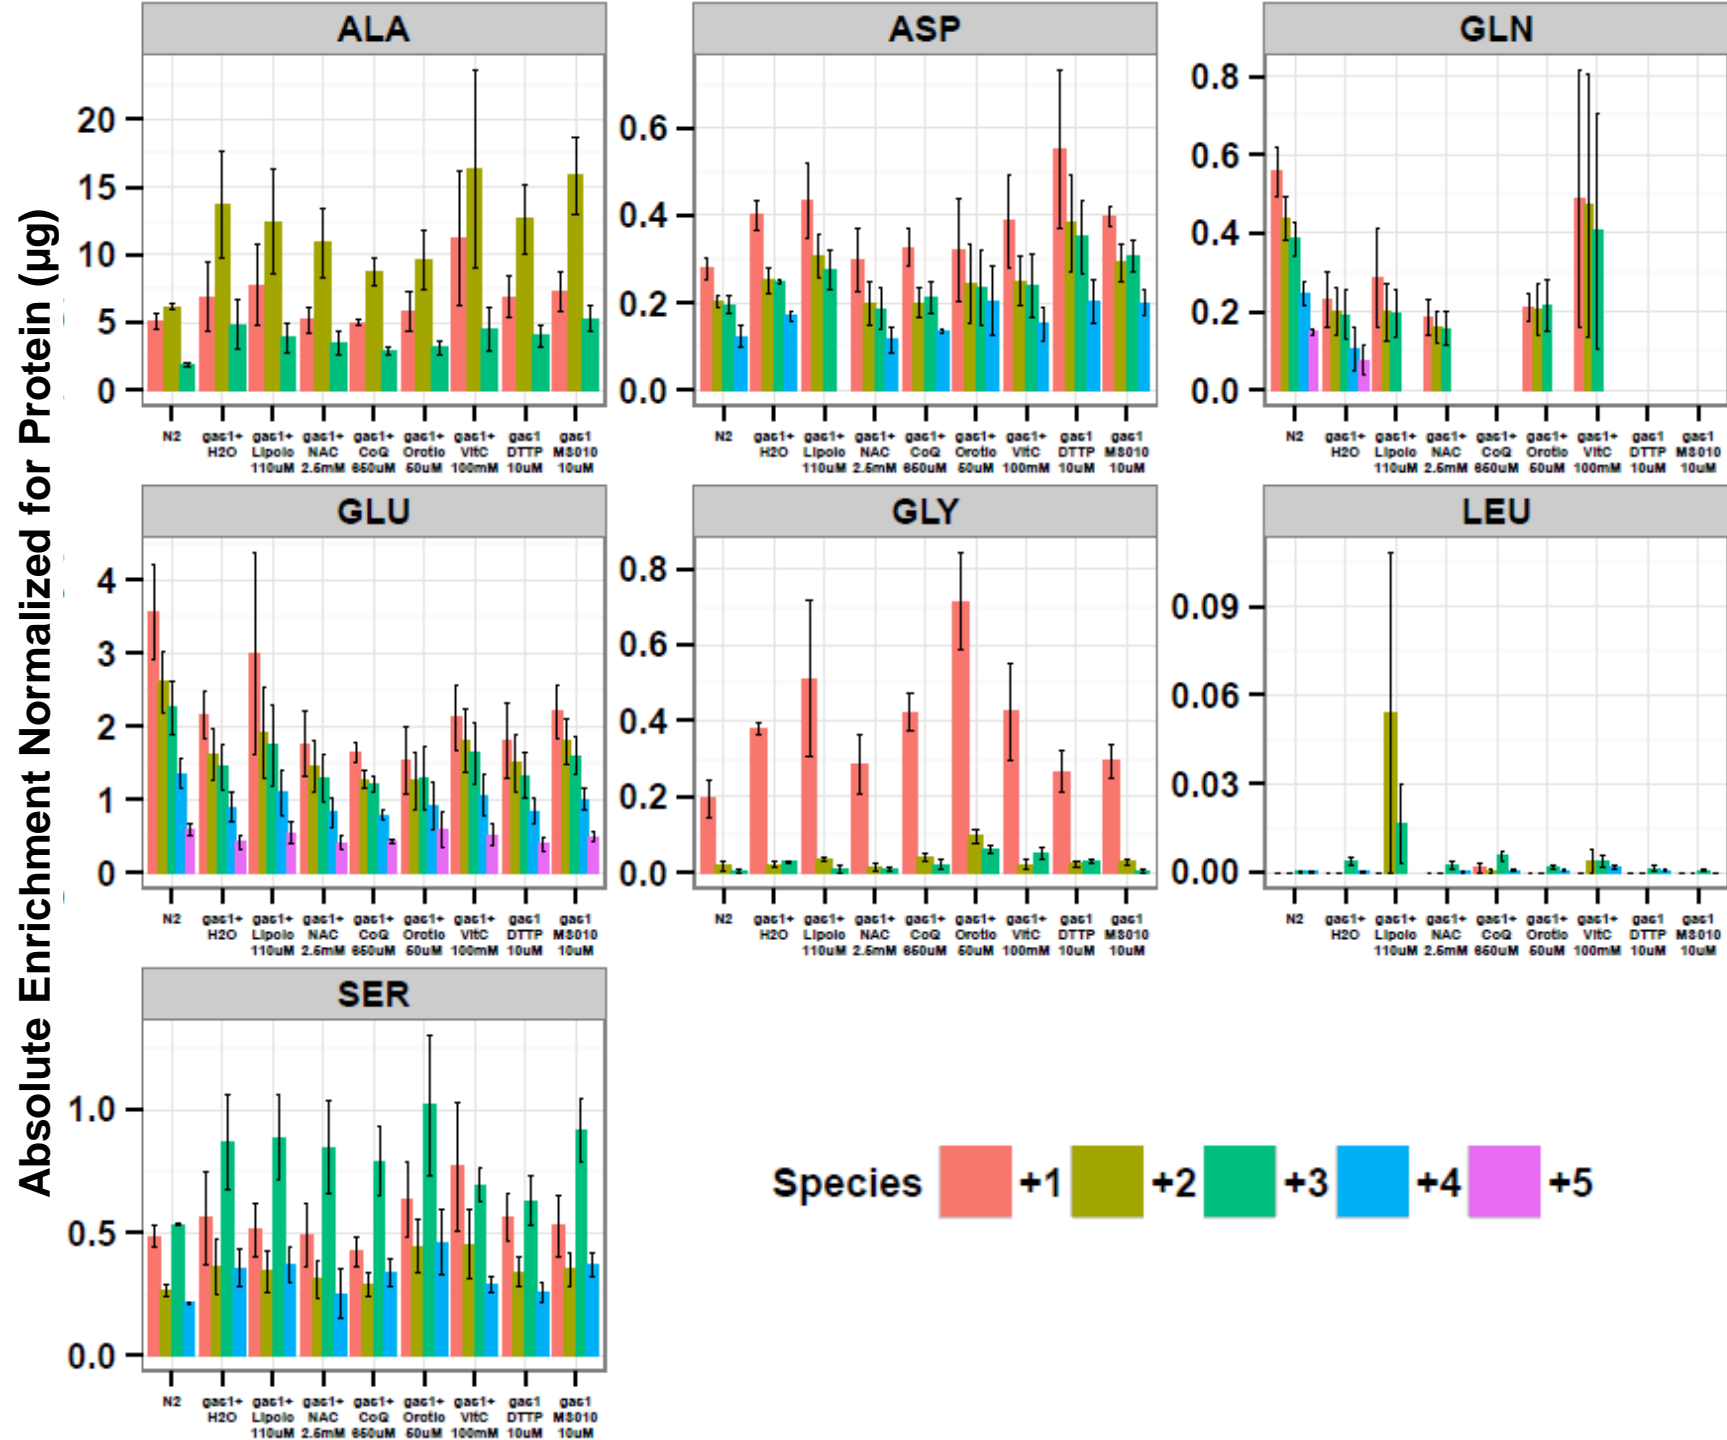

Fig S5

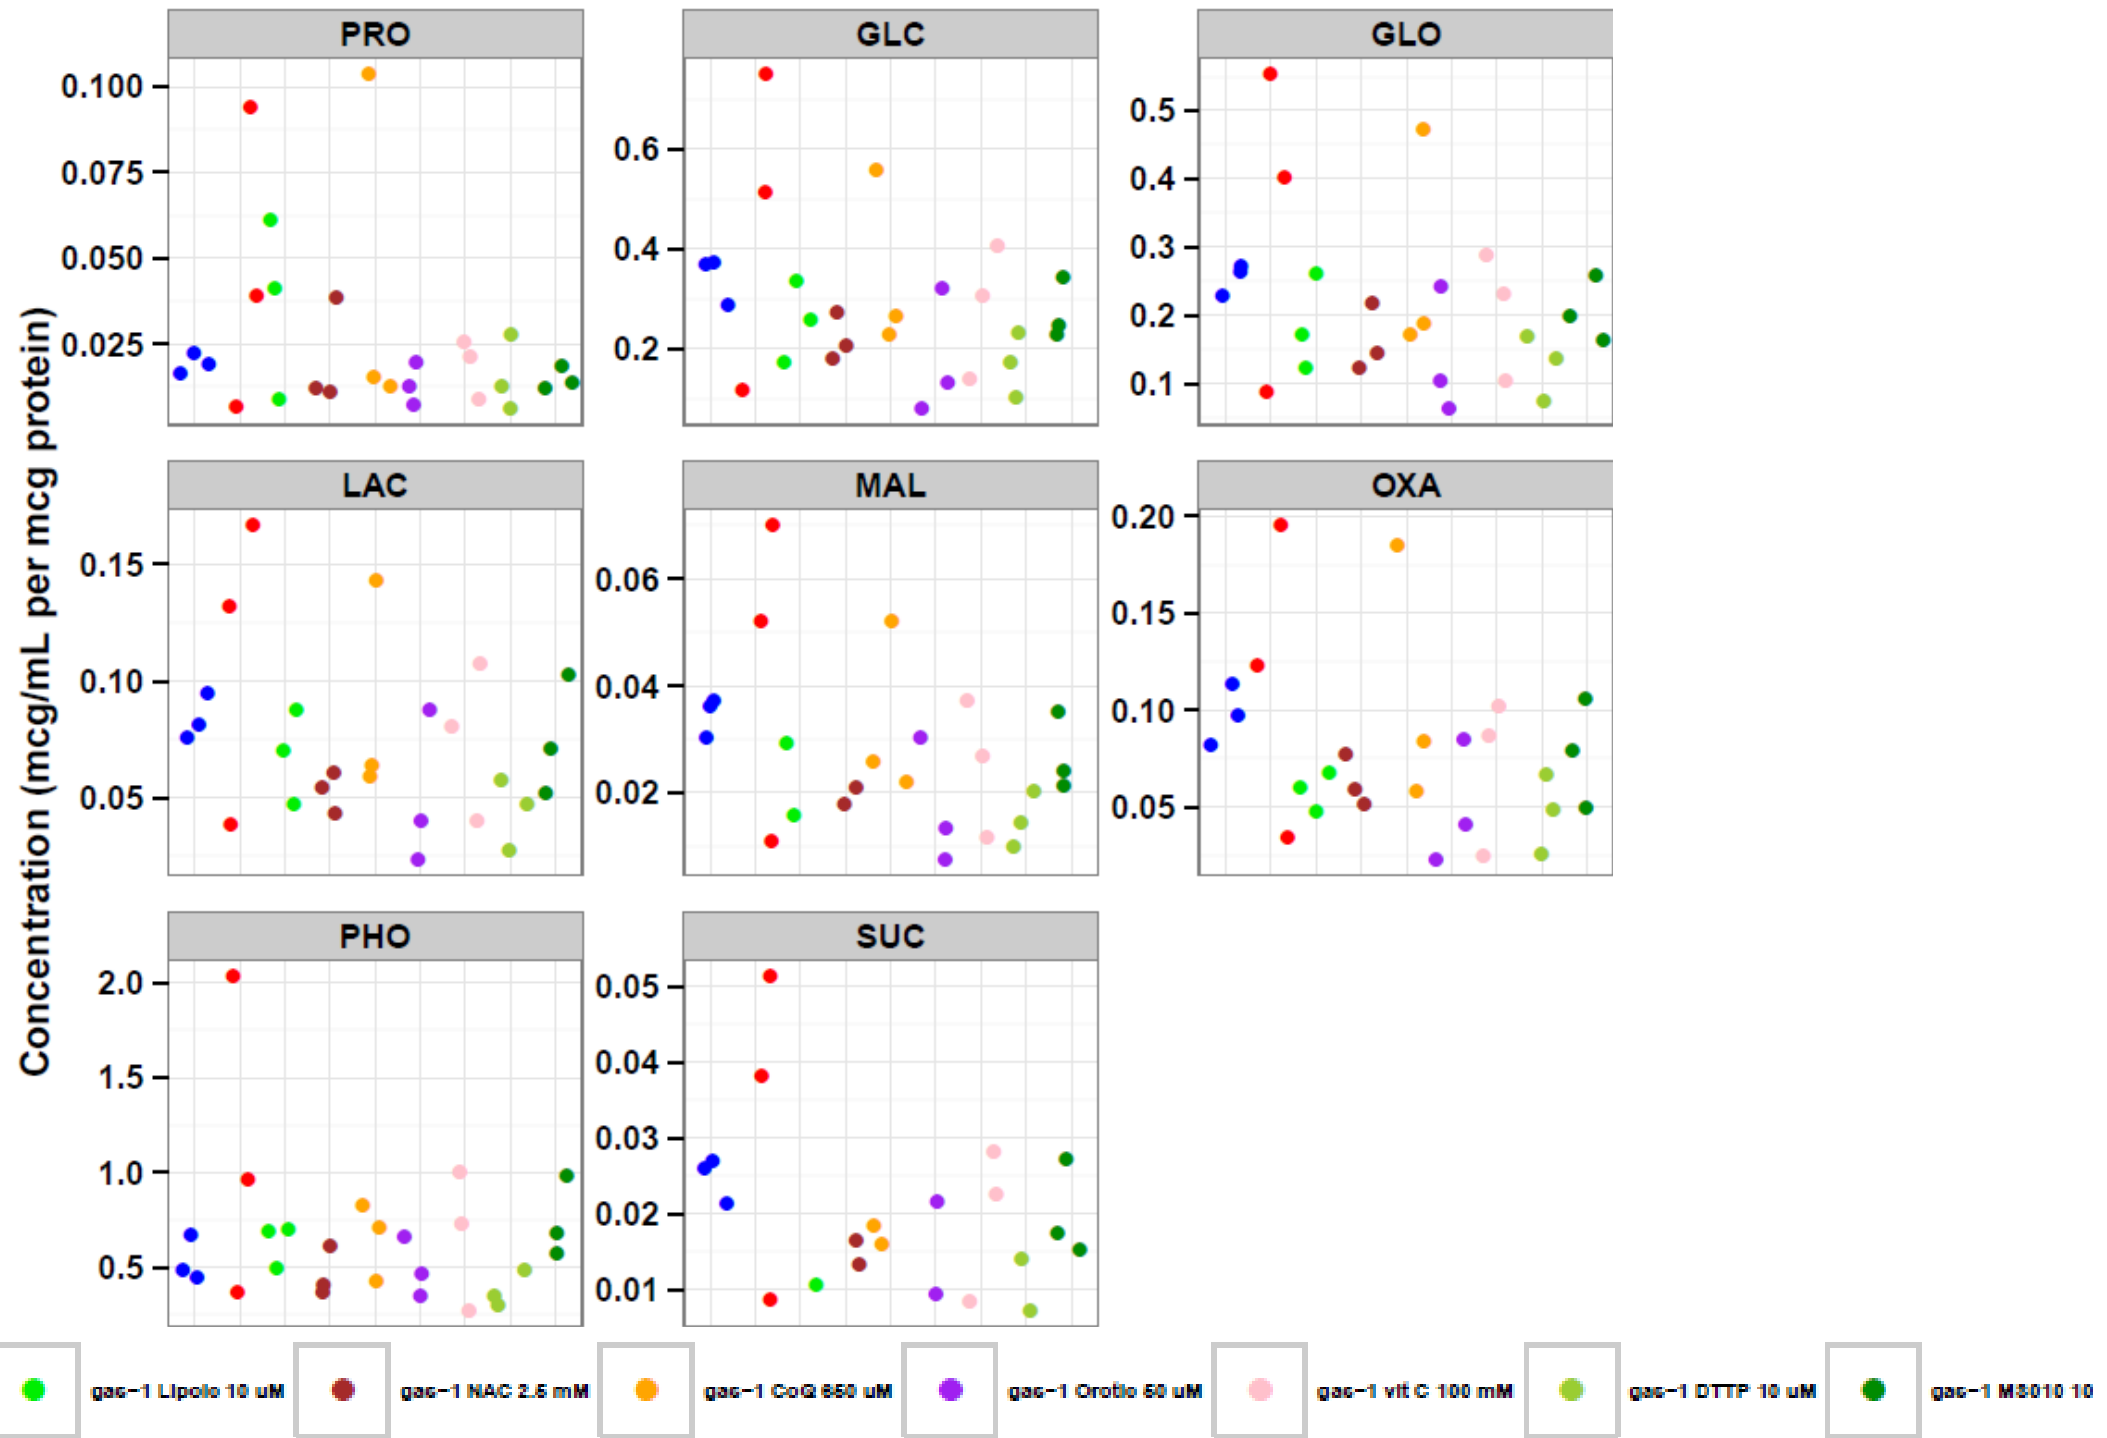

Fig S6

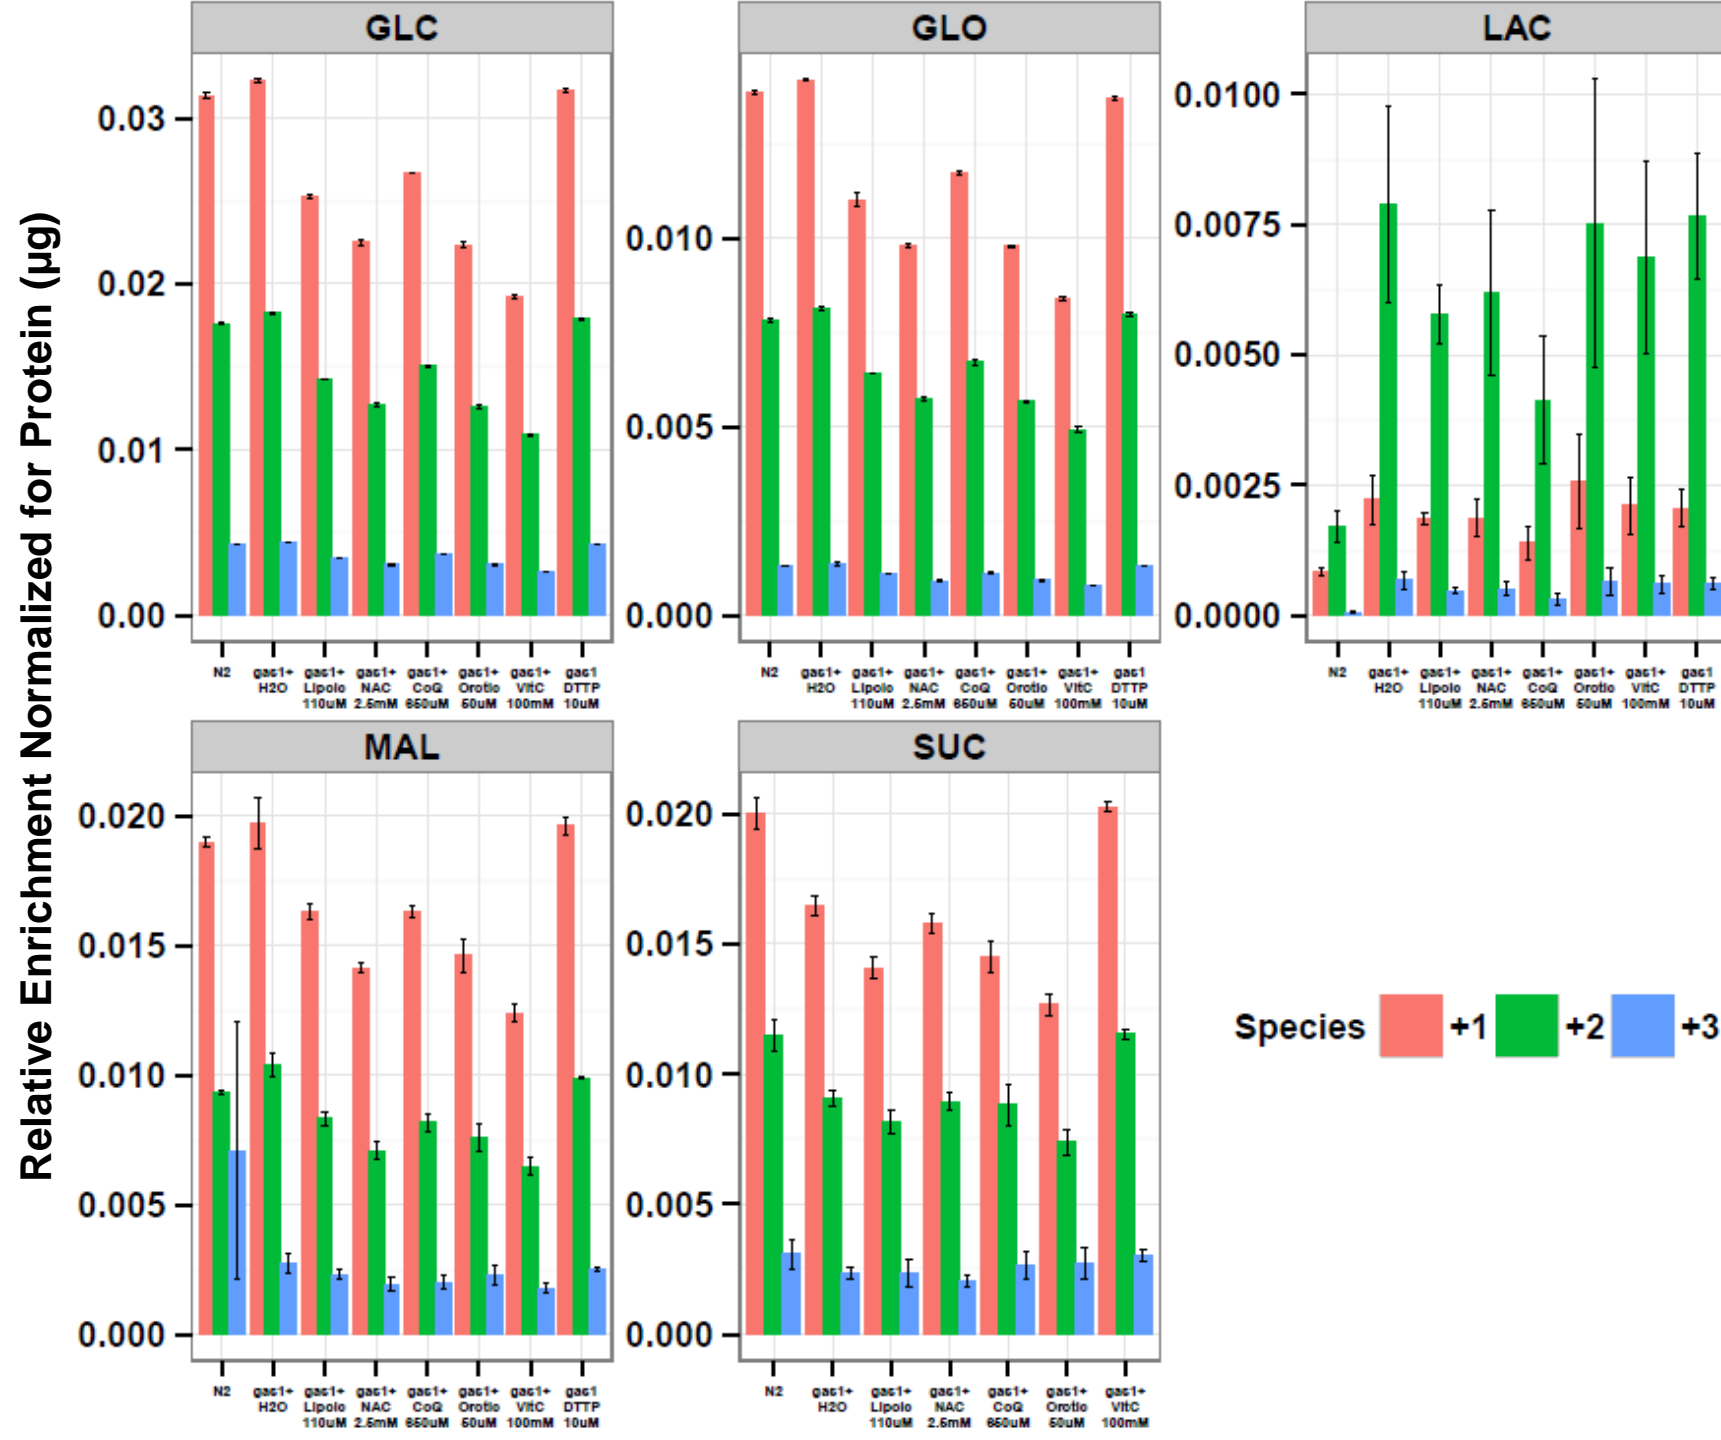

Fig S7

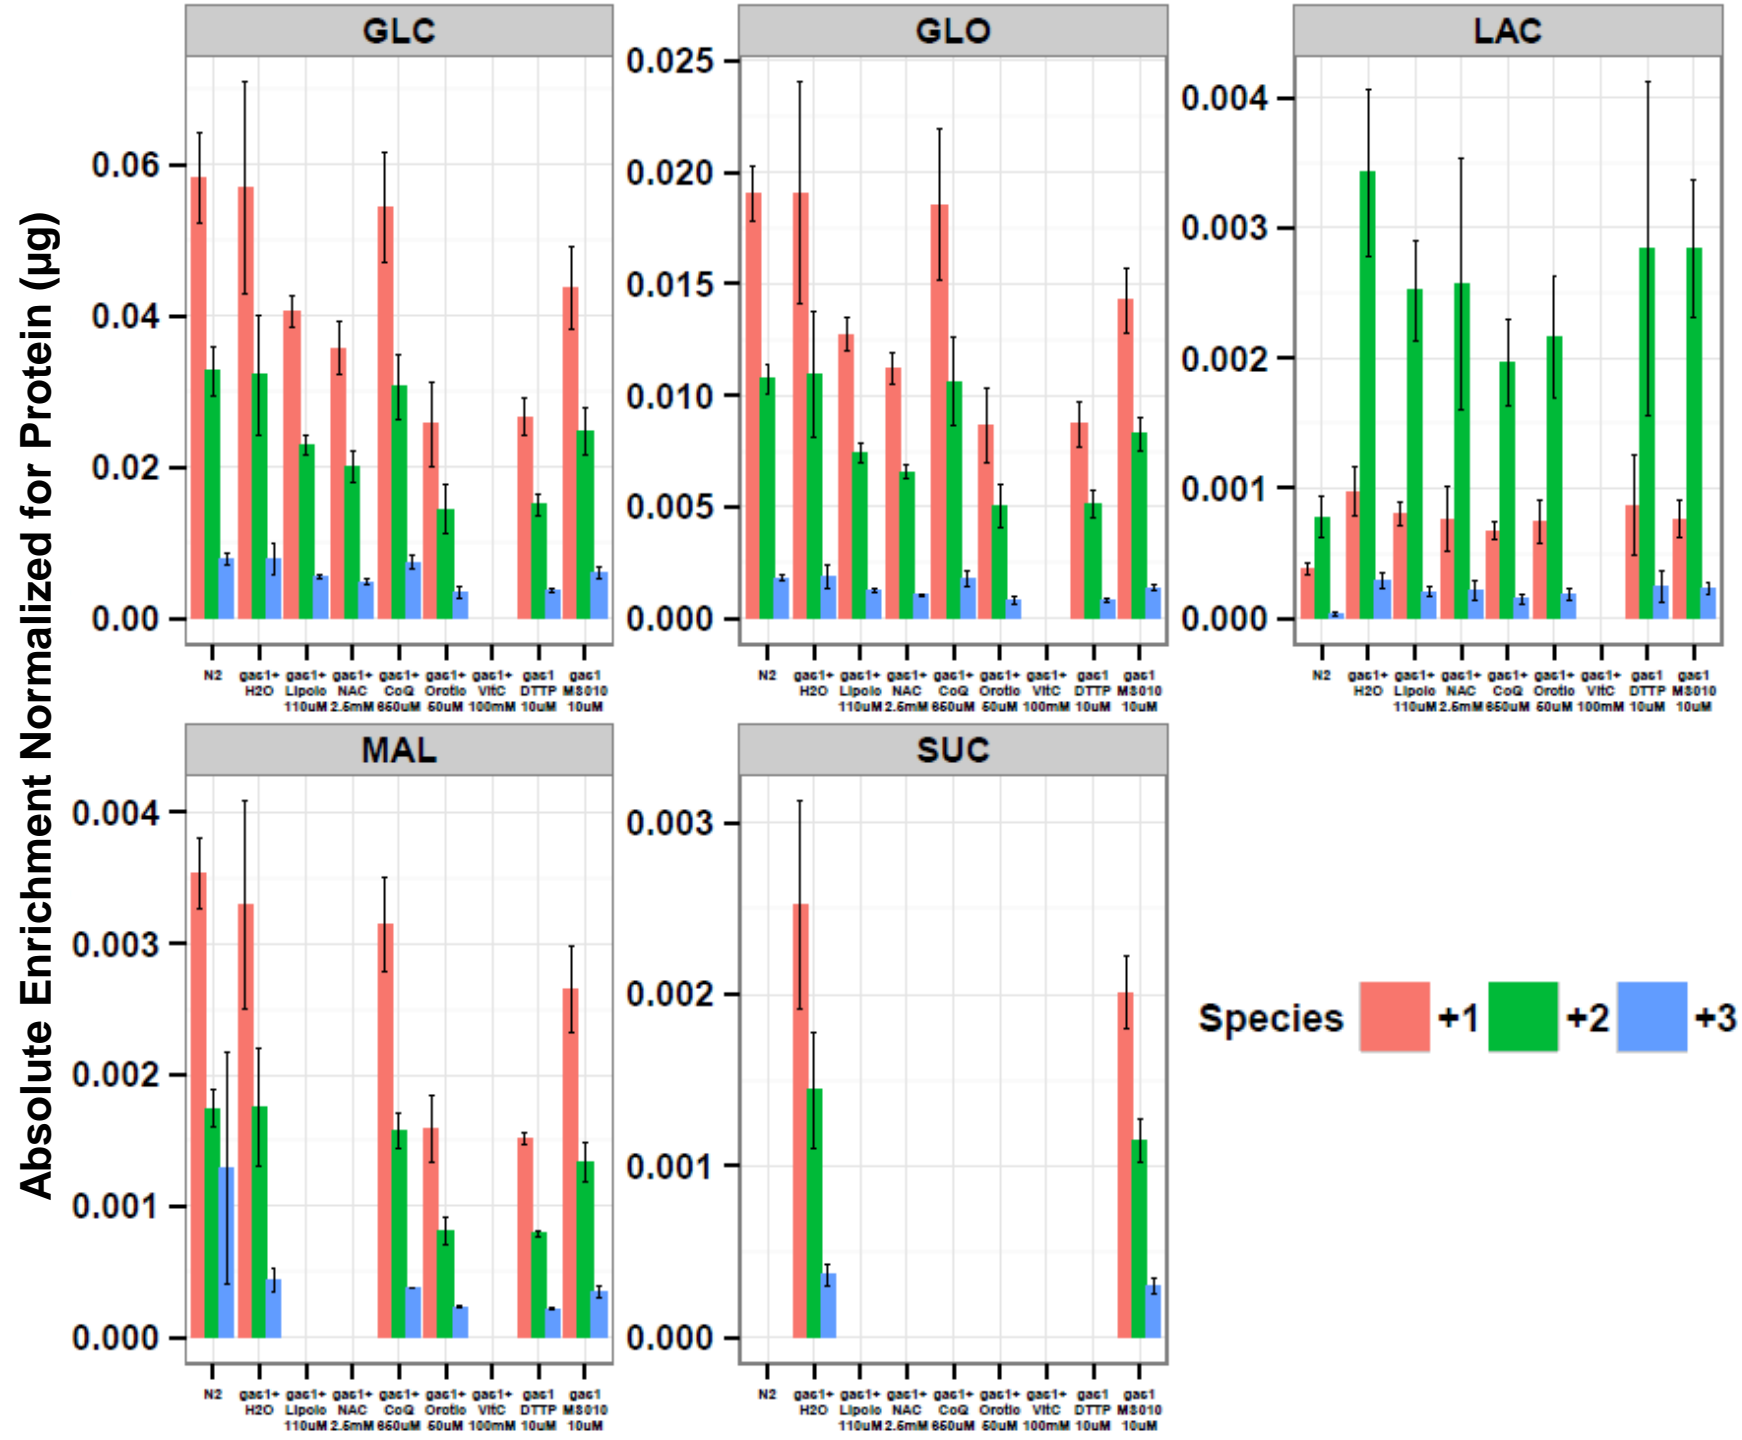



**Fig S8. Antioxidant drug effects on upregulated antioxidant pathway in *gas-1(fc21)* worms treated from L1 stage throughout development to 24 hour young adult stage.**

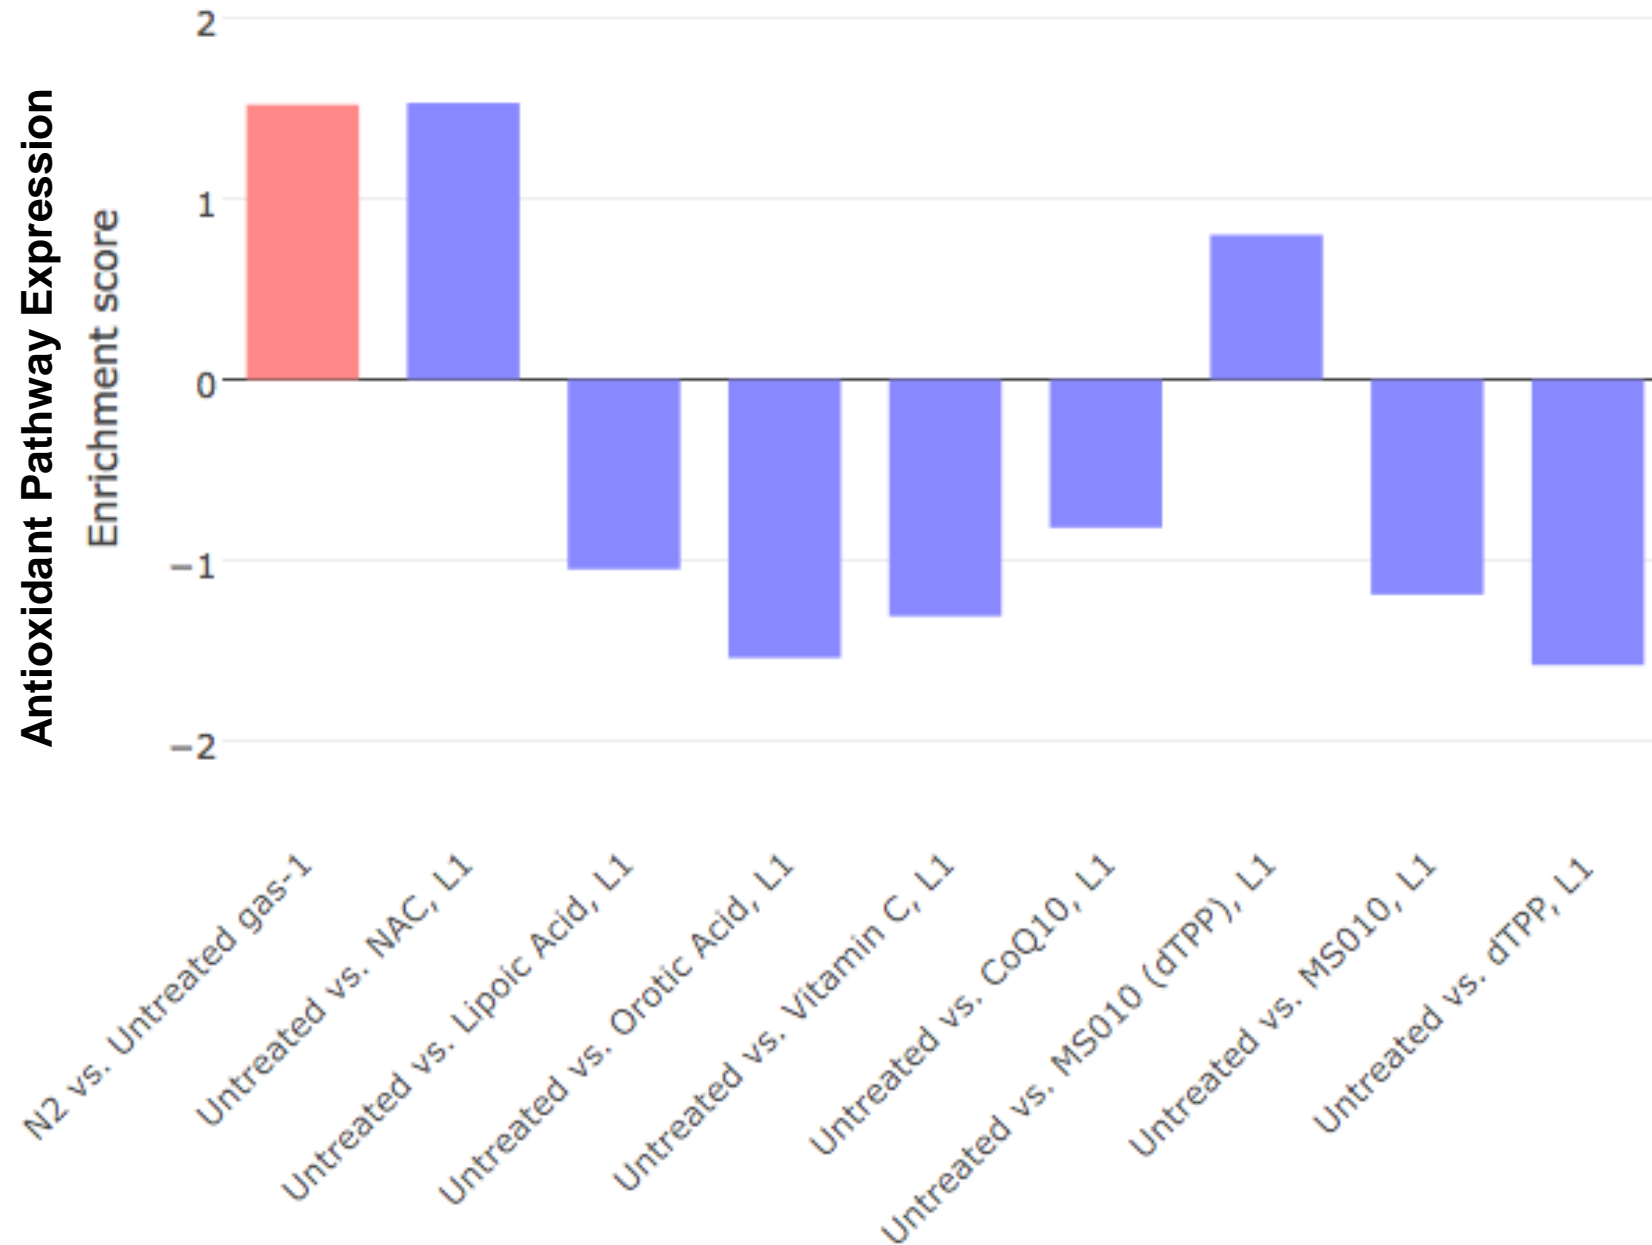

**Fig S9. Vitamin C treatment effects on normalizing (A) global gene expression and (B) glutathione pathway expression in *gas-1(fc21)* worms treated from L1 stage throughout development to 24 hour young adult stage.** Scatterplot shows the difference of group means, where each dot represents one gene. Colored dots indicate genes with significant changes ( $p < 0.05$ ) in both untreated *gas-1(fc21)* (vs. N2) and *gas-1(fc21)* + vitamin C (vs untreated).

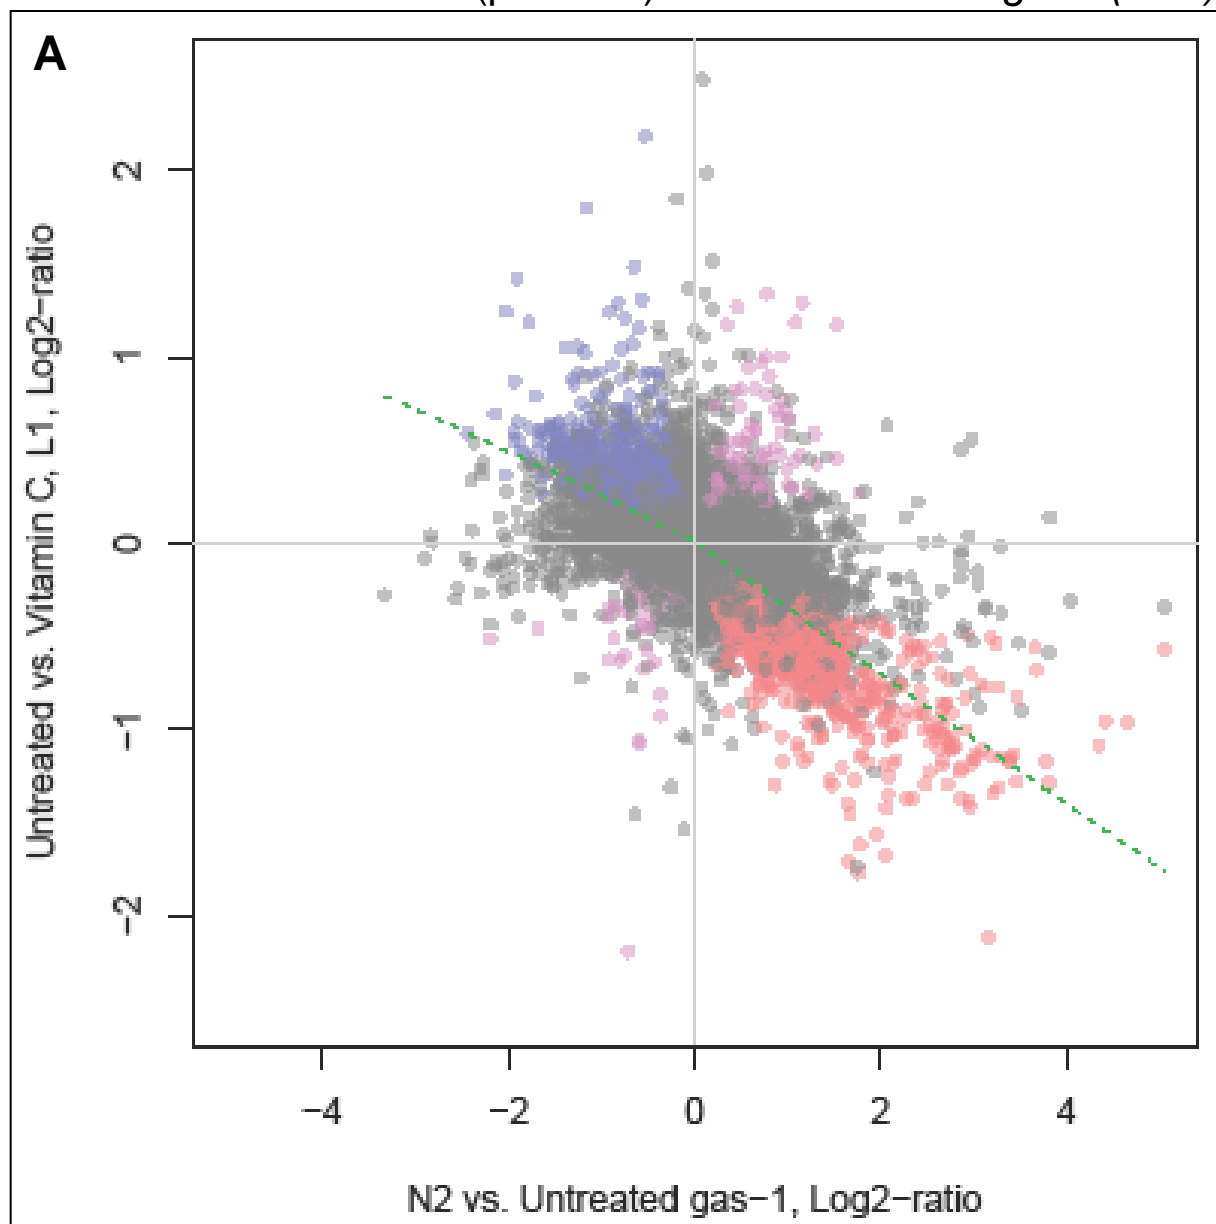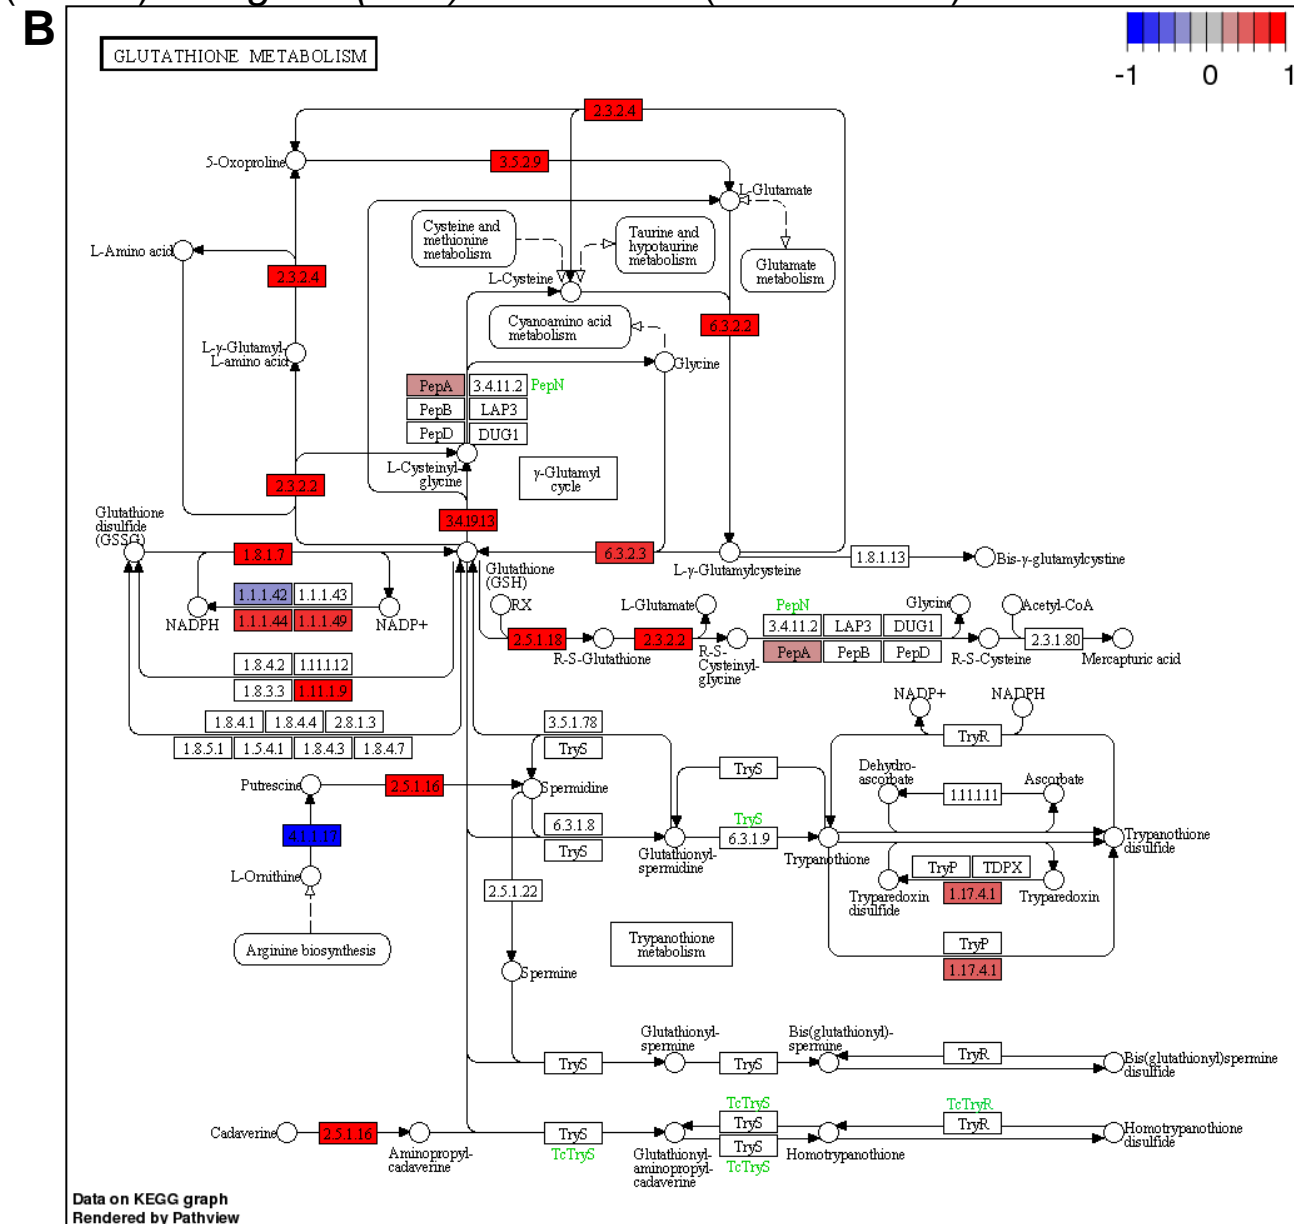

**Fig S10. Antioxidant drug effects on upregulated KEGG pathways in *gas-1(fc21)* worms treated from L1 stage throughout development to 24 hour young adult stage.**

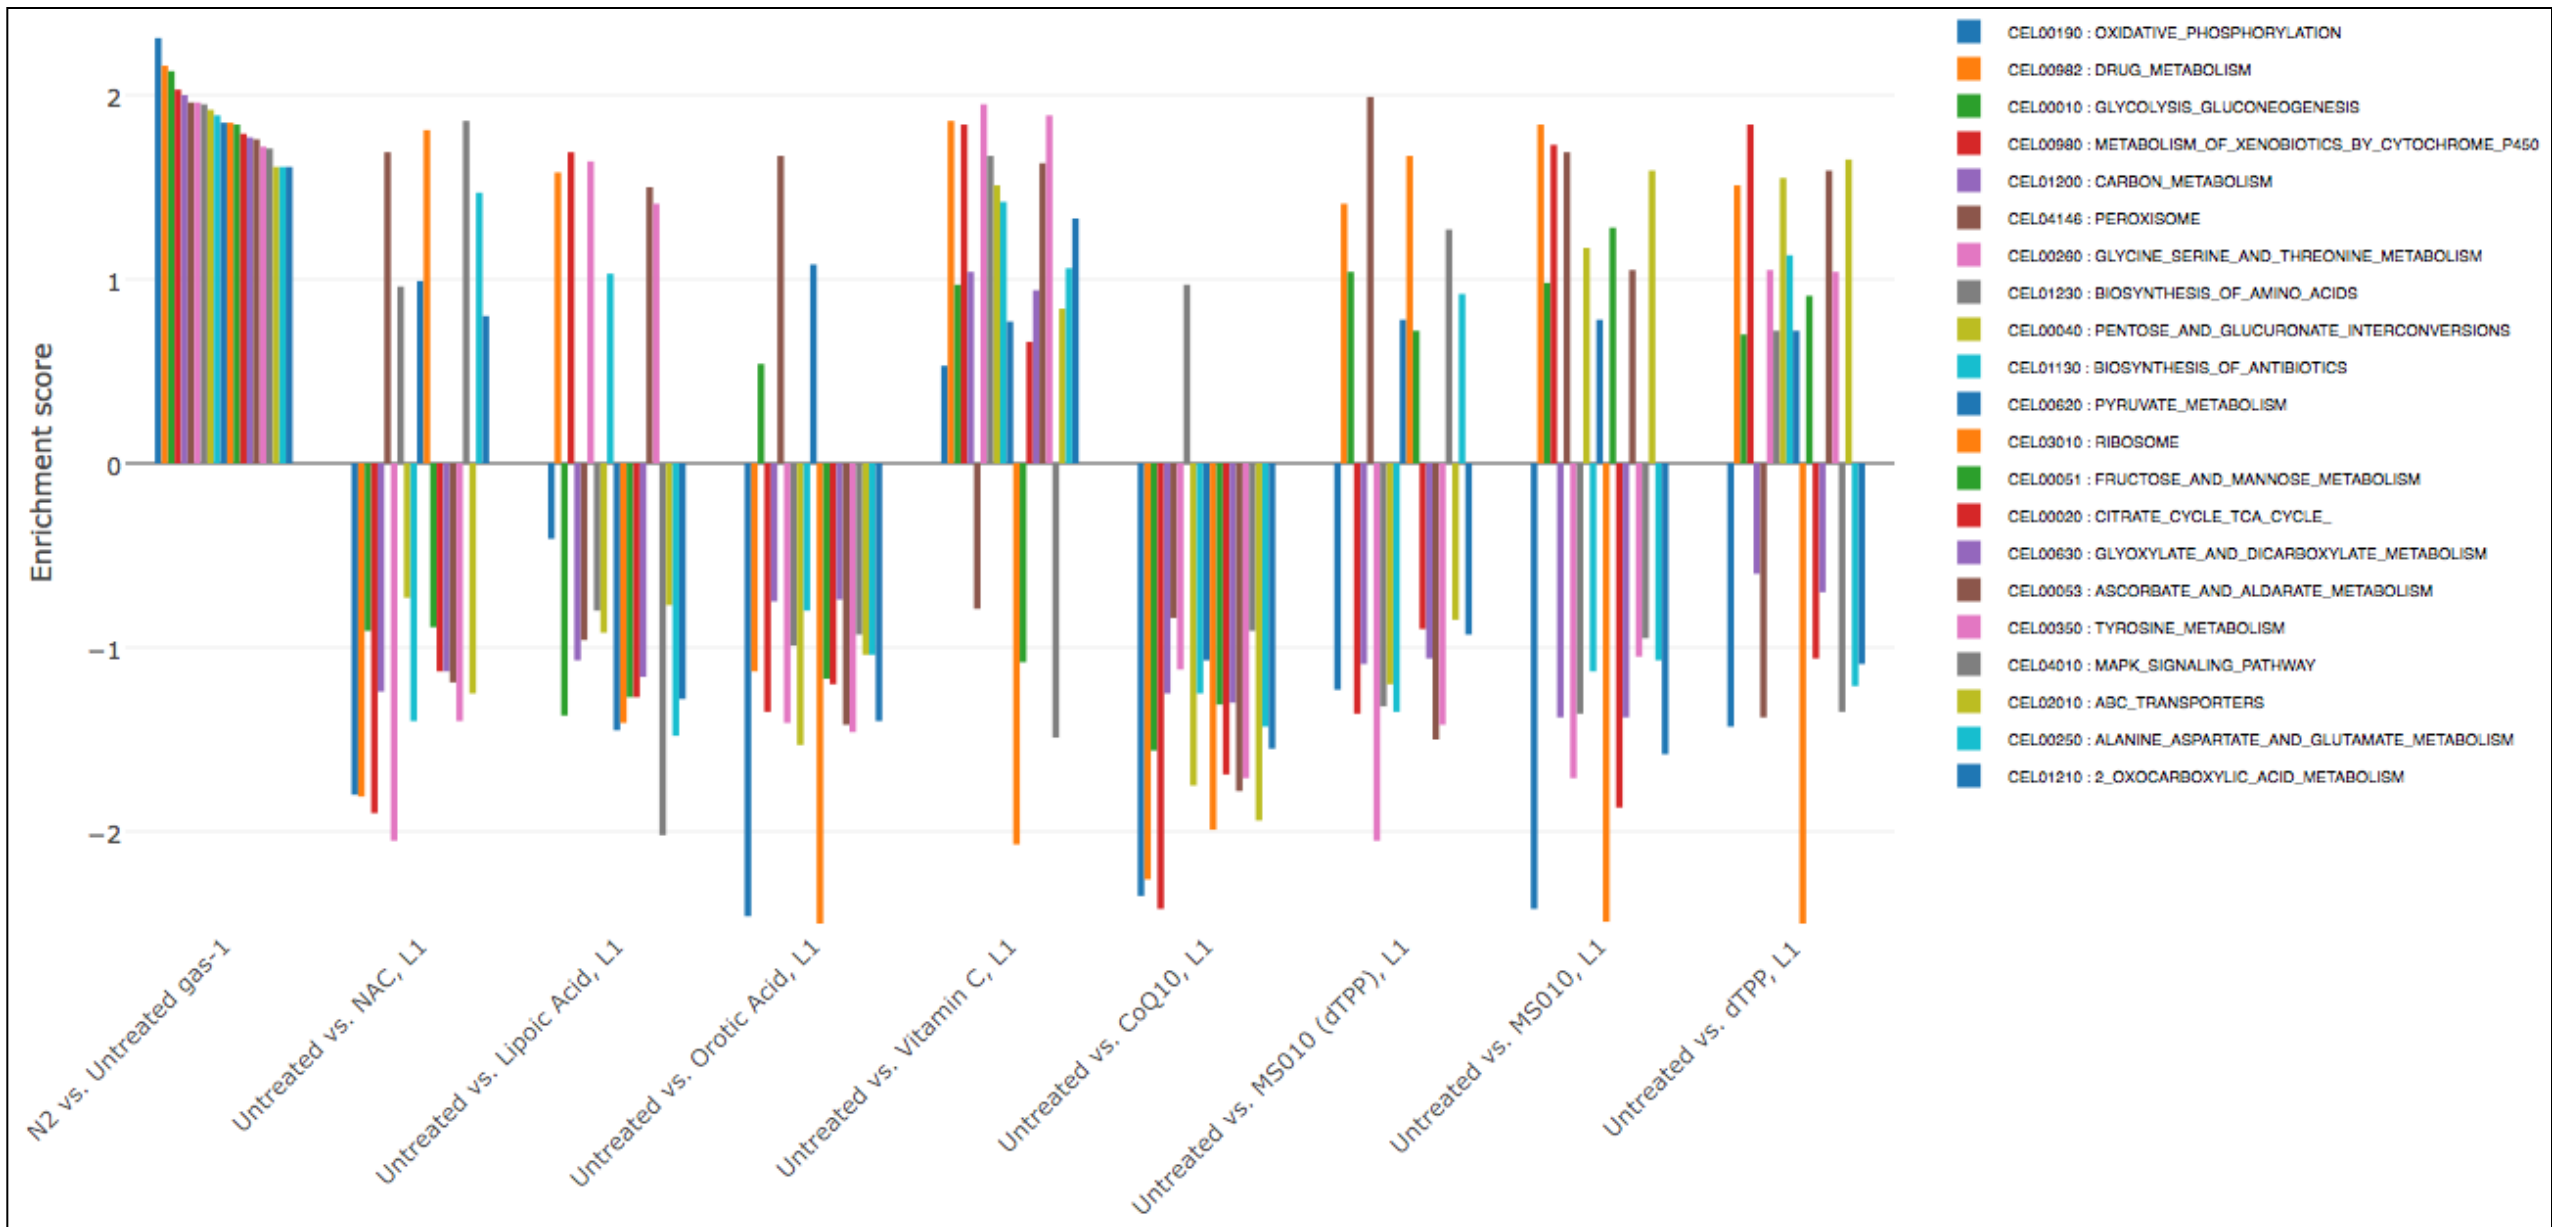

**Fig S11. Antioxidant drug effects on downregulated KEGG pathways in *gas-1(fc21)* worms treated from L1 stage throughout development to 24 hour young adult stage.**

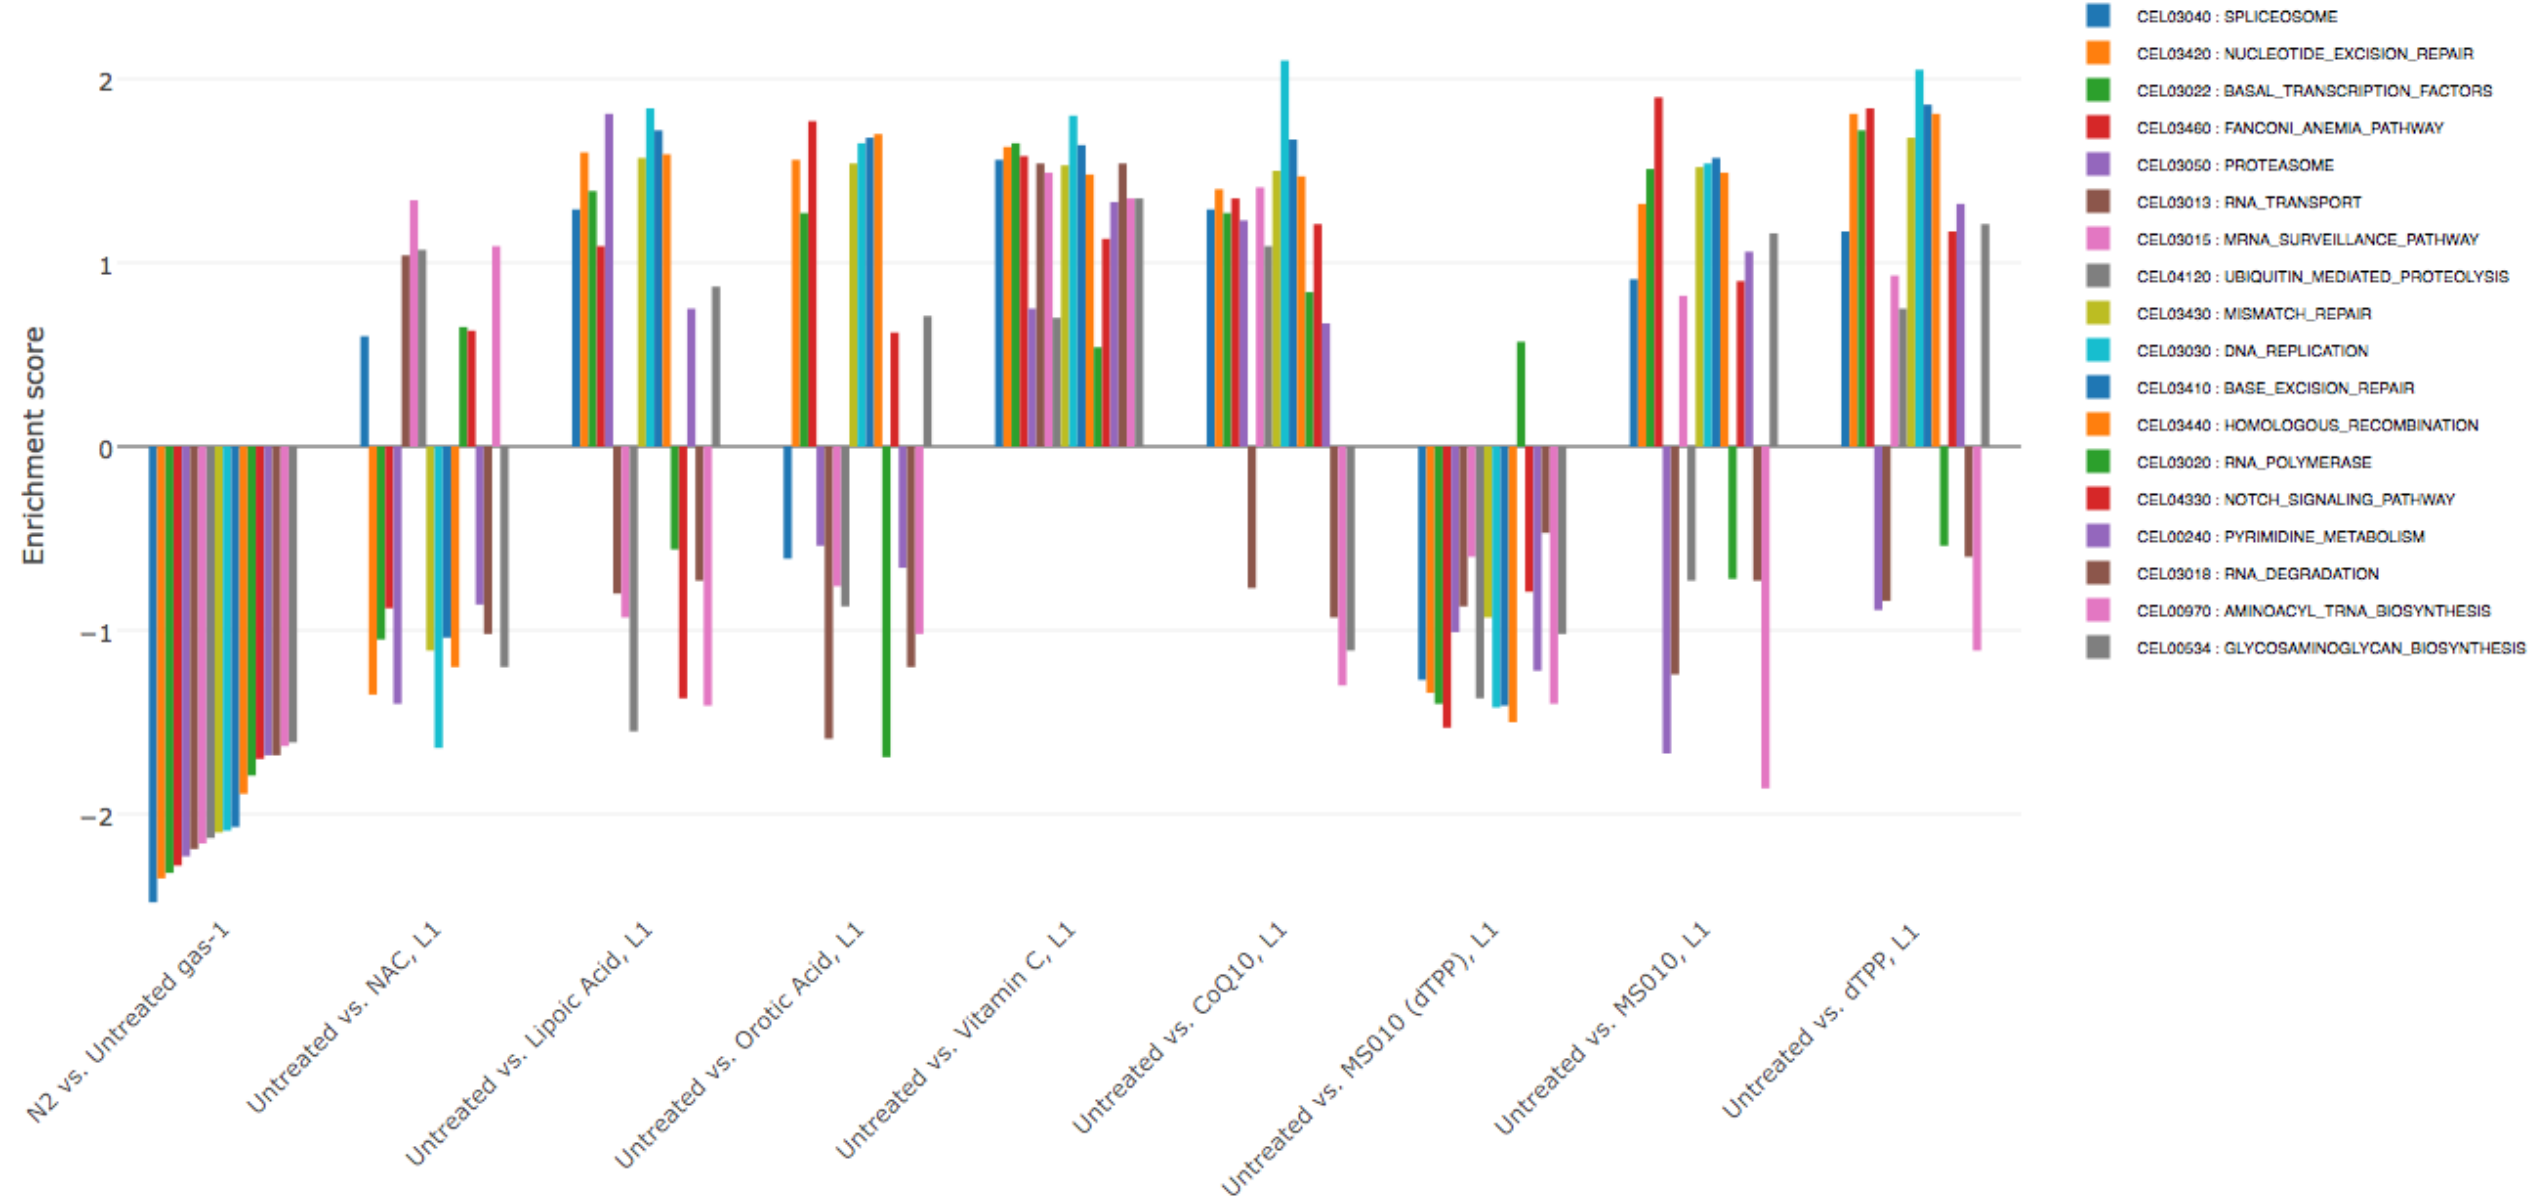

Supplement: NIHMS950548-supplement-1.pdf [file NIHMS950548-supplement-1.pdf]
